# A ‘How-to’ Guide for Interpreting Parameters in Resource- and Step-Selection Analyses

John Fieberg, Johannes Signer, Brian Smith, Tal Avgar

## Affiliations

- JF: Department of Fisheries, Wildlife, and Conservation Biology, University of Minnesota, St. Paul, MN, 55112
- JS: Wildlife Science, Faculty of Forestry and Forest Ecology, University of Goettingen, Göttingen Germany
- BS, TA: Department of Wildland Resources and Ecology Center, Utah State University, Old Main Hill, Logan, UT 84322, USA

## Abstract

1. Resource-selection and step-selection analyses allow researchers to link animals to their environment and are commonly used to address questions related to wildlife management and conservation efforts. Step-selection analyses that incorporate movement characteristics, referred to as *integrated step-selection analyses*, are particularly appealing because they allow modeling of both movement and habitat-selection processes.
2. Despite their popularity, many users struggle with interpreting parameters in resource-selection and step-selection functions. Integrated step-selection analyses also require several additional steps to translate model parameters into a full-fledged movement model, and the mathematics supporting this approach can be challenging for biologists to understand.
3. Using simple examples, we demonstrate how weighted distribution theory and the inhomoge-

22 neous Poisson point-process model can facilitate parameter interpretation in resource-selection  
23 and step-selection analyses. Further, we provide a “how to” guide illustrating the steps  
24 required to implement integrated step-selection analyses using the `amt` package.

25 4. By providing clear examples with open-source code, we hope to make resource-selection and  
26 integrated step-selection analyses more understandable and accessible to end users.

27 **Keywords:** habitat selection, inhomogeneous Poisson point-process, integrated step-selection  
28 analysis, resource-selection function, spatial hazards, step-selection function, telemetry, relative  
29 selection strength

## 30 Introduction

31 New technologies (e.g., improved Global Positioning System [GPS] collars) and advances in remote  
32 sensing have made it possible to collect animal location data on unprecedented spatial and temporal  
33 scales (Kays, Crofoot, Jetz, & Wikelski, 2015; Robinson et al., 2020), which in turn has fueled  
34 the development of new methods for modeling animal movement and for linking individuals to  
35 their environments (Guisan, Thuiller, & Zimmermann, 2017; Hooten, Johnson, McClintock, &  
36 Morales, 2017). Two of the most popular approaches for analyzing telemetry data, resource-selection  
37 and step-selection analyses, compare environmental covariates at locations visited by an animal  
38 (“used locations”) to environmental covariates at a set of locations assumed available to the animal  
39 (“available locations”) using logistic and conditional logistic regression, respectively (Boyce &  
40 McDonald, 1999; Fortin et al., 2005; Thurfjell, Ciuti, & Boyce, 2014). These methods are widely  
41 available in most statistical software packages, and thus, they provide a robust and easy-to-implement  
42 framework for analyzing habitat-selection patterns; note, here and elsewhere, we have used the term  
43 *habitat-selection* rather than *resource-selection* to highlight our broader interest in modeling the  
44 effects of a diverse set of environmental variables (e.g., those capturing risks and environmental  
45 conditions in addition to resources), but we will often use these terms interchangeably. Despite  
46 their popularity, our collective experience has been that most users struggle to interpret parameters  
47 in these models. Further, it seems that papers attempting to address this issue have had limited  
48 success, and in some aspects may have increased confusion (see e.g., Keating & Cherry, 2004;  
49 Johnson, Nielsen, Merrill, McDonald, & Boyce, 2006; Lele, Merrill, Keim, & Boyce, 2013; Avgar,

50 Lele, Keim, & Boyce, 2017; Chamaillé-Jammes, 2019).

51 Here, we highlight how point-process models and weighted distribution theory provide simple and  
52 effective frameworks for interpreting regression parameters in resource-selection and step-selection  
53 analyses. In the sections that follow, we begin by reviewing recent research connecting resource-  
54 selection functions to point-process models and weighted distribution theory. Using these connections,  
55 we demonstrate correct interpretation of parameters using simple examples of models fit to GPS  
56 locations of fisher (*Pekania pennanti*) from upstate New York (LaPoint et al., 2013a, 2013b). We  
57 then provide a short review of step-selection analyses, including their history and methods for  
58 parameter estimation. Step-selection analyses are particularly appealing because: 1) they provide  
59 an objective method for defining habitat availability in terms of movement constraints; 2) they  
60 relax the assumption that locations are statistically independent; and 3) by including movement  
61 characteristics (e.g., functions of step length and turn angle) as predictors, they provide a means to  
62 model both movement and habitat selection processes (termed an *integrated step-selection analysis*  
63 by Avgar, Potts, Lewis, & Boyce, 2016). Recognizing that many biologists may find the mathematics  
64 supporting integrated step-selection analyses intimidating, we aim to provide a “how to” guide  
65 demonstrating the steps required to implement the approach using the `amt` package (Signer, Fieberg,  
66 & Avgar, 2019). This demonstration is expanded upon using coded examples in the supplementary  
67 appendices, which we encourage the reader to explore. We end with a short discussion highlighting  
68 challenges related to statistical dependencies and model transferability.

## 69 **Resource-Selection Analyses**

### 70 **Logistic Regression**

71 Much of the confusion surrounding the interpretation of parameters in resource-selection analyses  
72 can be attributed to the use of logistic regression in a non-standard way. Logistic regression is most  
73 easily understood as a model for binary random variables that can take on one of two values (0  
74 or 1) with probability that depends on one or more explanatory variables (Hosmer, Lemeshow, &  
75 Sturdivant, 2013).

76 Consider, for example, a prospective study designed to infer how various environmental characteristics

77 influence whether a habitat patch will be used by one or more animals. In this case, we may randomly  
78 select  $n$  habitat patches and monitor them to determine if they are used ( $y_i = 1$ ) or not ( $y_i = 0$ ) for  
79  $i = 1, 2, \dots, n$ . Logistic regression allows us to model the probability that each patch will be used,  
80  $P(y_i = 1) = p_i$ , as a logit-linear function of patch-level predictors ( $X_{i1}, \dots, X_{ip}$ ) and regression  
81 parameters ( $\beta_1, \dots, \beta_p$ ):

$$y_i \sim \text{Bernoulli}(p_i)$$
$$\text{logit}(p_i) = \log\left(\frac{p_i}{1-p_i}\right) = \beta_0 + \beta_1 X_{i1} + \dots + \beta_p X_{ip}$$

82 After having fit a model, we can exponentiate the regression coefficients,  $\exp(\beta_k)$ , to quantify how  
83 the odds of use,  $p/(1-p)$ , change as we increase the  $k^{\text{th}}$  predictor by 1 unit while holding all other  
84 predictors constant. We can also use the inverse-logit transformation (eqn. (1)) to estimate the  
85 probability that a patch will be used, given its set of spatial predictors:

$$p_i = \frac{\exp(\beta_0 + \beta_1 X_{i1} + \dots + \beta_p X_{ip})}{1 + \exp(\beta_0 + X_{i1}\beta_1 + \dots + X_{ip}\beta_p)} \quad (1)$$

86 The logit transformation ensures that  $p$  will be constrained between 0 and 1 for all values of the  
87 predictor variables.

88 Contrast this approach with how logistic regression is used to study habitat selection. In a typical  
89 habitat-selection study, logistic regression models are fit to separate samples of used and available  
90 sample units, groups that are not mutually exclusive (i.e., available habitat patches may also be  
91 used). We will refer to the combined locations as *use-availability* data. In this case,  $y_i$  is no longer a  
92 Bernoulli random variable since  $p_i$  depends on the ratio of used to available points (which is under  
93 control of the analyst). Further, most analyses of telemetry data involve point-level sampling in  
94 continuous space rather than discrete sample units. In this case, the probability associated with any  
95 point is necessarily 0 to ensure the distribution integrates to 1 over all of available space. Thus, it is  
96 perhaps not surprising that there has been considerable confusion and controversy surrounding the  
97 use of logistic regression with use-availability data (e.g., Keating & Cherry, 2004; Johnson et al.,

98 2006; Chamaille-Jammes, 2019).

99 Various arguments have been constructed to justify the use of logistic regression when analyzing  
100 use-availability data (Manly, McDonald, Thomas, McDonald, & Erickson, 2002; Johnson et al.,  
101 2006; Aarts, MacKenzie, McConnell, Fedak, & Matthiopoulos, 2008), but a significant breakthrough  
102 came when Warton & Shepherd (2010) made a connection between logistic-regression and an  
103 inhomogeneous Poisson point-process (IPP). An IPP is a model for random locations or events in  
104 space, where the expected spatial density of the locations depends on spatial predictors (see next  
105 section, **Inhomogeneous Poisson Point-process Model**). Warton & Shepherd (2010) showed  
106 that as the number of available points is increased towards infinity, the slope parameters in logistic  
107 regression models will converge to the slope parameters in an IPP model. Interestingly, several  
108 other popular approaches for analyzing species distribution data, including MaxEnt (Phillips &  
109 Dudík, 2008; Elith et al., 2011), weighted distribution theory with an exponential link function  
110 (Lele & Keim, 2006), and resource utilization functions (Millspaugh et al., 2006), have been shown  
111 to be equivalent to fitting an inhomogeneous Poisson point-process model (Warton & Shepherd,  
112 2010; Aarts, Fieberg, & Matthiopoulos, 2012; Fithian & Hastie, 2013; Hooten, Hanks, Johnson, &  
113 Alldredge, 2013; Renner et al., 2015).

114 Instead of focusing on  $p_i$ , as is typical in prospective studies, logistic regression applied to use-  
115 availability data should simply be viewed as a convenient tool for estimating coefficients in a  
116 *resource-selection function*,  $w(x; \beta) = \exp(X_{i1}\beta_1 + \dots X_{ip}\beta_p)$  (Boyce & McDonald, 1999; Boyce et  
117 al., 2002). As we will see in the next section, this expression is equivalent to the intensity function  
118 of an IPP model, but with the intercept (the log of the baseline intensity) removed; the baseline  
119 intensity gives the expected density of points when all covariates are 0. Because resource-selection  
120 functions do not include this baseline intensity, they are said to measure “relative probabilities  
121 of use” or, alternatively, said to be “proportional to the probability of use” (Manly et al., 2002).  
122 Although the term *probability of use* sounds appealing, it is important to remember the challenges  
123 with defining probability at the point-level. Further, although probability of use is easily defined for  
124 discrete sample units (e.g. grid cells), these probabilities should increase with the size of the spatial  
125 unit and also with the study duration (Lele & Keim, 2006; Lele et al., 2013). Thus, with telemetry  
126 studies, it seems more natural to model spatial (or spatio-temporal) “hazards” or rates of use in

127 continuous space (and time), from which “probability of use” can be determined by integrating these  
128 hazards over whatever spatial (and temporal) unit is deemed appropriate. Point-process models  
129 allow us to do just that!

## 130 **Inhomogeneous Poisson Point-Process (IPP) Model**

131 The IPP model provides a simple framework for modeling the density of points in space as a  
132 log-linear function of spatial predictors through a spatially-varying intensity function,  $\lambda(s)$ :

$$\log(\lambda(s)) = \beta_0 + X_1(s)\beta_1 + \dots X_p(s)\beta_p \quad (2)$$

133 where  $s$  is a location in geographic space, and  $X_1(s), \dots, X_p(s)$  are spatial predictors associated with  
134 location  $s$ . The intercept,  $\beta_0$ , determines the log-density of points (within a small homogeneous area  
135 around  $s$ ) when all  $X_i(s)$  are 0, and the slopes,  $\beta_1, \dots, \beta_p$ , describe the effect of spatial covariates on  
136 the log density of locations in space. The IPP model can be understood by listing its key features  
137 and assumptions, namely:

138 1. The number of locations in an area  $G$ ,  $n_G$ , is given by a Poisson random variable with mean

$$139 \quad \mu_G = \int_G \lambda(s) ds.$$

140 2. Locations are independent (any clustering can be explained by spatial covariates).

141 If all available spatial predictors are measured only at a coarse scale (e.g., at a set of gridded or  
142 rasterized cells), then fitting the IPP model is equivalent to fitting a Poisson regression model (Aarts  
143 et al., 2012). Specifically, one may treat the counts,  $y_i$ , in  $n$  discrete spatial units ( $i = 1, \dots, n$ ), as  
144 a set of independent Poisson random variables with means  $= \lambda(s_i)|G_i|$  where  $\lambda(s_i)$  is given by eqn.  
145 (2) and  $|G_i|$  is the area of grid cell  $i$ . Note that  $\log(E[y_i]) = \log(\lambda(s_i)|G_i|) = \log(\lambda(s_i)) + \log(|G_i|)$ ;  
146 thus, the log-link used in Poisson regression implies the area,  $|G_i|$ , should be included as an offset  
147 (a predictor variable with with regression coefficient fixed at a value of 1).

148 When spatial predictors are available at the point-level, as will be the case whenever constructing  
149 “distance to” predictors (e.g., distance to nearest road, water source, etc), it will be advantageous  
150 to model the locations in continuous space. In telemetry studies, the absolute density of points

151 will be determined by the frequency and duration of data collection. Thus,  $\beta_0$  will not be of  
 152 biological interest, and it will be appropriate to focus efforts on estimating and interpreting the  
 153 slope coefficients,  $\beta_1, \dots, \beta_p$ , which determine relationships between the spatial covariates and the  
 154 relative density of locations throughout the study area (Fithian & Hastie, 2013). As is the case with  
 155 linear and generalized linear models (e.g., Poisson regression), we can estimate parameters using  
 156 maximum likelihood. This technique requires writing down an expression, called the *likelihood*, that  
 157 captures the data generating mechanism in terms of one or more parameters. With telemetry data,  
 158 it makes sense to work with the conditional likelihood of the IPP model (Aarts et al., 2012), i.e.,  
 159 the likelihood of the observed locations in space, conditional on there being  $n$  observed locations in  
 160 total. The conditional likelihood is given by:

$$L(\beta_1, \dots, \beta_p | s_1, \dots, s_n) = \prod_{i=1}^n \frac{\lambda(s_i)}{\int_{s \in G} \lambda(s) ds} \quad (3)$$

161 where the product is over the  $n$  observed locations,  $\lambda(s_i)$  is the intensity function evaluated at  
 162 observation  $i$ , and the integral in the denominator evaluates the intensity function over the spatial  
 163 domain of interest (Cressie, 1992; Aarts et al., 2012). If we plug  $\lambda(s_i) = \exp(\beta_0 + X_1(s_i)\beta_1 +$   
 164  $\dots X_p(s_i)\beta_p)$  into eqn. (3),  $\beta_0$  will cancel from the numerator and denominator, leaving us with:

$$L(\beta; s_1, \dots, s_n) = \prod_{i=1}^n \frac{\exp(X_1(s_i)\beta_1 + \dots X_p(s_i)\beta_p)}{\int_{s \in G} \exp(X_1(s)\beta_1 + \dots X_p(s)\beta_p) ds} = \prod_{i=1}^n \frac{w(x(s_i); \beta)}{\int_{s \in G} w(x(s); \beta) ds} \quad (4)$$

165 where  $w(x(s); \beta) = \exp(\beta_1 x_1(s) + \dots \beta_p x_p(s))$  is our resource-selection function.

166 The binomial likelihood associated with logistic regression differs from eqn. (4), but Warton &  
 167 Shepherd (2010) showed that logistic regression estimators of slope coefficients converge to the those  
 168 of the IPP model as the number of available points increases toward infinity. Thus, the connection  
 169 to the IPP model addresses a common question that arises when estimating resource-selection  
 170 functions, namely, “how many available points do I need?” The exact answer depends on how  
 171 difficult it is to estimate the integral in the denominator of eqn. (4); the recommendation we offer  
 172 is to increase the number of available points until the estimated slope coefficients no longer change  
 173 much. Fithian & Hastie (2013) later showed that the convergence results of Warton & Shepherd

174 (2010) hold only if the model is correctly specified, but assigning “infinite weights” to available points  
175 ensures the results hold more generally. Therefore, when fitting logistic regression or other binary  
176 response models (e.g., boosted regression trees) to use-availability data, we also suggest assigning a  
177 large weight (say 1000 or more) to each available location and a weight of 1 to all observed locations  
178 (larger values can be used to verify that results are robust to this choice). For a coded example in R  
179 (R Core Team, 2019), see section **Interpreting Parameters in Resource-Selection Functions**  
180 and Supplementary Appendix A.

## 181 **Weighted Distributions**

182 Weighted distribution theory provides another way to interpret parameters in resource-selection  
183 functions (Lele & Keim, 2006; Johnson, Thomas, Ver Hoef, & Christ, 2008). Let:

- 184 •  $u(x)$  = the frequency distribution of habitat covariates,  $x$ , at locations used by our study  
185 animals.
- 186 •  $a(x)$  = the frequency distribution of habitat covariates,  $x$ , at locations assumed to be available  
187 to our study animals.

188 We can think of the *resource-selection* function,  $w(x; \beta)$ , as providing a set of weights that takes us  
189 from the distribution of available habitat to the distribution of used habitat:

$$u(x) = \frac{w(x, \beta)a(x)}{\int_{z \in E} w(z, \beta)a(z)dz} \quad (5)$$

190 The denominator of eqn. (5) ensures that the left hand side integrates to 1 and thus,  $u(x)$  is a proper  
191 probability distribution; the variable  $z$  here is just a dummy variable used to allow integration  
192 over the frequency distribution of our environmental covariates. Because these distributions are  
193 written in terms of the habitat covariates,  $x$ , instead of geographical locations, we say that model is  
194 parameterized in *environmental space* ( $E$ ) (Hirzel & Le Lay, 2008; Elith & Leathwick, 2009).

195 To show that weighted distribution theory is consistent with the IPP formulation discussed above,  
196 we can rewrite eqn. (5) in *geographic space* ( $G$ ):



$$u(s) = \frac{w(x(s), \beta)a(s)}{\int_{g \in G} w(x(g), \beta)a(g)dg}, \quad (6)$$

197 where the denominator integrates over a geographic area,  $G$ , that is assumed to be available to  
198 the animal and  $g$  is a dummy variable for integration. Here  $u(s)$  is equivalent to the utilization  
199 distribution encountered in the literature on probabilistic estimators of animal home ranges (Van  
200 Winkle, 1975; Worton, 1989; Signer & Fieberg, 2020) and tells us how likely we are to find an  
201 individual at location  $s$  in geographic space. The utilization distribution,  $u(s)$ , depends on the  
202 environmental covariates associated with location  $s$ , through  $w(x(s); \beta)$ , and the distribution of  
203 available locations in geographic space,  $a(s)$ . Typically,  $a(s)$  is assumed to be a uniform distribution  
204 within the geographical domain of availability,  $G$  (e.g., the individual's home range, the population's  
205 range, or the species range depending on the hierarchical level of habitat selection of interest;  
206 Johnson, 1980), and all areas within  $G$  are assumed to be equally available to the organism. Hence,  
207  $a(s)$  is typically a constant,  $1/|G|$ , that cancels from the numerator and denominator. Then, if we  
208 let  $w(x(s); \beta) = \exp(x\beta)$ , we end up with the conditional likelihood of the Inhomogeneous Poisson  
209 process model (eqn. (4)) (Aarts et al., 2012).

## 210 **Interpreting Parameters in Resource-Selection Functions**

211 To demonstrate how the IPP and weighted distribution theory frameworks help with interpreting  
212 parameters in fitted resource-selection functions, we now consider a simple example using 3,004  
213 locations of a fisher named Lupe tracked as part of a larger telemetry study (LaPoint et al., 2013a,  
214 2013b). These data are publicly available and have been featured in a workshop highlighting  
215 Movebank's *Env-DATA* system for annotating locations with environmental covariates (Dodge et  
216 al., 2013; Fieberg et al., 2018). The location data were combined with available points sampled  
217 randomly from within a minimum convex polygon (MCP) formed using Lupe's locations. The  
218 used and available locations were then transformed to a projected coordinate reference system  
219 (NAD83 / Conus Albers) and annotated with environmental variables measuring population density  
220 (University & CIAT, 2005), elevation (U. S. / Japan ASTER Science Team, 2009), and landcover  
221 class (Defourny et al., 2009). The original landcover data were grouped to form a variable named  
222 `landuseC` with the following categories: `forest`, `grass` and `wet` (Fig. 1). We created centered

223 (mean = 0) and scaled (SD = 1) variables labeled `elevation` and `popden` from the original elevation  
224 and population density variables. We also created an indicator variable, `case_`, taking on a value of  
225 1 for all used points and 0 for all available points (later, we discuss how to choose the number of  
226 available points).

227 For ease of interpretation, we will begin by assuming the effects of elevation, population density, and  
228 landcover class are additive and linear on the log scale (eqn. (2)). Later, we will discuss how we can  
229 relax these assumptions using interactions to allow the effect of covariates to depend on the value  
230 of other habitat covariates and polynomials or splines to relax the assumption of linearity. We  
231 assign a weight of 5000 to the available locations and a weight of 1 to all observed locations (Fithian  
232 & Hastie, 2013). We can then fit a weighted logistic regression model using the `glm` function in R:

```
Lupe.dat$w <- ifelse(Lupe.dat$case_==1, 1, 5000)
```

```
RSF.Lupe <- glm(case_ ~ elevation + popden + landuseC,  
               data = Lupe.dat,  
               weight = w,  
               family = binomial)
```

233 Before interpreting the coefficients, it is important to make sure we have included a sufficient number  
234 of available points to allow parameter estimates to converge to stable values. To evaluate parameter  
235 stability, we fit logistic regression models to data sets with increasing numbers of available points  
236 (from 1 available point per used point to 100 available points per used point; see Supplementary  
237 Appendix A for the code). The intercept decreased as we increased the number of available points  
238 (as it is roughly proportional to the log difference between the numbers of used and available  
239 points), but the slope parameter estimates, on average, did not change much once we included at  
240 least 10 available points per used point (Fig. 2). Further, as expected, estimates varied less from  
241 sample to sample as we increased the number of available points. Thus, we conclude that, in this  
242 particular case, having 10 available points per used point is sufficient for interpreting the slope  
243 coefficients. Using more available points reduces Monte Carlo error, however, so we will proceed  
244 with 100 available points per used point.

245 Let's consider the interpretation of the continuous covariates reflecting elevation and population

246 density (Table 1, *Model 1*). Qualitatively, we might infer from the positive coefficient for **elevation**  
247 and negative coefficient for **popden** that, all other things being equal, Lupe is likely to select  
248 locations at higher elevations and in areas of lower population density. But, how do we interpret  
249 these coefficients quantitatively? Consider the following two locations, both in the same landcover  
250 class and with the same associated population density, but differing by 1 unit in **elevation** (since  
251 we have scaled this variable, a difference of 1 implies that the two observations differ by 1 SD in the  
252 original units of elevation):

- 253 • location  $s_1$ : **elevation** = 3, **popden**=1.5, **landuseC** = **wet**
- 254 • location  $s_2$ : **elevation** = 2, **popden**=1.5, **landuseC** = **wet**

255 Using eqn. (6), we can calculate the relative risk of Lupe using location 1 relative to location 2:

$$\frac{u(s_1)}{u(s_2)} = \frac{\exp(3\beta_{elevation} + 1.5\beta_{pop\_den} + 0\beta_{grass} + 1\beta_{wet})a(s_1)}{\exp(2\beta_{elevation} + 1.5\beta_{pop\_den} + 0\beta_{grass} + 1\beta_{wet})a(s_2)} \quad (7)$$

256 where we have dropped the integral from eqn. (6) because it appears in both the numerator and  
257 denominator (and thus, cancels out). Now, if both locations are *equally available*, then  $a(s_1) = a(s_2)$ ,  
258 and we have:

$$\frac{u(s_1)}{u(s_2)} = \frac{\exp(3\beta_{elevation}) \exp(1.5\beta_{pop\_den} + \beta_{wet})}{\exp(2\beta_{elevation}) \exp(1.5\beta_{pop\_den} + \beta_{wet})} = \exp(\beta_{elevation}) = \exp(0.303) = 1.35 \quad (8)$$

259 In epidemiology,  $\exp(\beta)$  is referred to as a *risk* or *hazard ratio*. In the context of habitat-selection  
260 analyses, Avgar et al. (2017) refer to it as quantifying *relative selection strength* (RSS).

261 Note that we would arrive at the exact same expression if we chose *any* two locations that differed  
262 by 1 unit of **elevation** and had the same values for **popden** and **landuseC**. Thus,  $\exp(\beta_{elevation})$   
263 quantifies the risk (or hazard) ratio of two locations that differ by 1 SD unit of **elevation** but  
264 are otherwise equivalent (i.e., they are equally available and have the same values of all other  
265 habitat covariates). If Lupe were to be presented with two such hypothetical locations, the model  
266 suggests she would be 1.35 times more likely to choose the one with the higher elevation. A similar  
267 interpretation can be ascribed to **popden**. Given two observations that differ by 1 SD unit of **popden**

268 but are otherwise equal, Lupe would be  $\exp(-0.183) = 0.833$  times as likely to choose the location  
269 with higher population density (or, equivalently,  $\exp(0.183) = 1.20$  times more likely to choose the  
270 location with the lower population density).

271 What about the coefficients for the landcover categories? Looking again at the regression output  
272 (Table 1, *Model 1*), we see that **grass** has a negative coefficient and **wet** has a positive coefficient.  
273 It is tempting to infer that Lupe spends most of her time in wet areas and rarely spends time in  
274 grassy habitats. As Figure 1 makes it clear, however, these inferences are not exactly correct. First,  
275 it is important to understand how categorical predictors are encoded in regression models. There  
276 are a number of different ways to parameterize the effect of categorical variables and unfamiliar  
277 readers may want to work through an introductory regression text (e.g., Chapter 6 of Kéry (2010)).  
278 The default coding in R is to treat one of the levels (whichever comes first alphabetically) as a  
279 reference level and then to create a set of dummy variables that contrast the remaining levels of  
280 the categorical variable with this reference level. In our case, **forest** is the reference level. The  
281 coefficients associated with **grass** and **wet** represent contrasts between these land cover classes and  
282 the **forest** class.

283 Let's again consider 2 locations, this time assuming they have the same elevation and population  
284 densities, but with one location in **wet** and the other location in **forest**:

- 285 • location  $s_1$ : **elevation = 2, popden=1.5, landuseC = wet**
- 286 • location  $s_2$ : **elevation = 2, popden=1.5, landuseC = forest**

287 The relative risk of an animal using location 1 relative to location 2 is given by (eqn. (6)):

$$\frac{u(s_1)}{u(s_2)} = \frac{\exp(2\beta_{elevation} + 1.5\beta_{pop\_den} + 0\beta_{grass} + 1\beta_{wet})a(s_1)}{\exp(2\beta_{elevation} + 1.5\beta_{pop\_den} + 0\beta_{grass} + 0\beta_{wet})a(s_2)} = \exp(\beta_{wet})\frac{a(s_1)}{a(s_2)} \quad (9)$$

288 Thus, *assuming the two locations are equally available*, we might infer that Lupe would be  
289  $\exp(0.250) = 1.28$  times more likely to choose the **wet** location than the location in **forest**.  
290 Of course, we know from Figure 1 that **forest** and **wet** are not equally available on the landscape.  
291 The higher availability of **forest** habitat implies that Lupe is more likely to be in **forest** than  
292 **wet**. We could attempt to correct for differences in availability within the MCP surrounding Lupe's

293 locations by multiplying our result by the ratio of habitat availability for **wet** relative to **forest**  
294 habitats (2.3% versus 95.7%; Fig. 1), giving us  $\exp(0.250)(0.023)/(0.957) = 0.03$ . This calculation  
295 suggests we are ( $1/0.03 = 33$ ) times more likely to find Lupe in **forest** than **wet** habitat. With  
296 this calculation we had to assume, perhaps naively, that the availability distributions for **popden**  
297 and **elevation** were the same in both **wet** and **forest** cover classes. In reality, if Lupe decides to  
298 move from **forest** to **wet**, it is likely that she will experience a change in **elevation** and **popden**  
299 too (i.e., these factors will not be held constant). To quantify the relative risk of finding Lupe in  
300 **forest** versus **wet** habitat, while also accounting for the effects other environmental characteristics  
301 that are associated with these habitat types, we can use integrated hazards – i.e., we can integrate  
302 the spatial utilization distribution,  $u(s)$ , over all **forest** and **wet** habitats:

$$\frac{u(s, s \in \text{forest})}{u(s, s \in \text{wet})} = \frac{\int_G u(s)I(s \in \text{forest})ds}{\int_G u(s)I(s \in \text{wet})ds} \quad (10)$$

303 where  $I(s \in \text{forest})$  and  $I(s \in \text{wet})$  are indicator functions equal to 1 when location  $s$  is in **forest**  
304 or **wet**, respectively (and 0 otherwise). We can estimate this ratio using:

$$\frac{\hat{u}(s, s \in \text{forest})}{\hat{u}(s, s \in \text{wet})} = \frac{\sum_{i=1}^{n_a} \hat{w}(x(s_i); \hat{\beta})I(s_i \in \text{forest})}{\sum_{i=1}^{n_a} \hat{w}(x(s_i); \hat{\beta})I(s_i \in \text{wet})}. \quad (11)$$

305 where the sum is over the distribution of available locations.

306 This ratio is also equal to 33, which agrees with the observed data; Lupe was found in **forest** habitat  
307 33 times more often than in **wet** habitat (see Supplementary Appendix A for code demonstrating  
308 how to calculate these quantities in R). Thus, we conclude Lupe is 33 times more likely to be found  
309 in **forest** than **wet** habitat, assuming she restricts her movements to the MCP surrounding her  
310 observed locations and all of this MCP is equally available to her.

311 Before moving on, it is important to note that naively-adjusted (multiplying by availability of **wet**  
312 and **forest** habitats) and integrated-hazards (i.e., adjusted) risk ratios will not always agree. In  
313 fact, we find that they differ when comparing the risk of finding Lupe in **wet** versus **grass** habitat,  
314 with the integrated-hazards risk ratio better agreeing with the observed data (see Supplementary  
315 Appendix A). Somewhat related, Avgar et al. (2017) suggested calculating *average effects* for

316 continuous predictors,  $X$ , by comparing the change in relative risk from increasing  $X$  by 1 unit  
317 (to  $X = x + 1$ ) to the average value of  $w(x(s); \beta)$  for all locations  $s$  with  $x(s) = x$ . These average  
318 effects will also be influenced by cross-correlations among predictor variables included in the model.

319 Instead of integrating  $u(s)$  over discrete cover types, we could integrate over a specific geographic  
320 area. In addition, we could choose to change the area of interest (and thus, area of integration)  
321 from  $G$  to  $\tilde{G}$ . This approach makes it possible to use the same integrated hazards approach (i.e.,  
322 eqn. (11)) to project how Lupe would spend her time in a novel environment (referred to as an  
323 “out-of-sample” prediction). Out-of-sample predictions often suffer from poor accuracy, especially  
324 when compared to “in sample” predictions, i.e., predictions for the same area and time frame from  
325 which the original data were collected (Torres et al., 2015; Yates et al., 2018). We return to this  
326 important point in the discussion section.

327 Let’s next consider what happens if we change the reference level of the land cover variable from  
328 **forest** to **wet** (Table 1, *Model 2*).

```
Lupe.dat <- within(Lupe.dat,  
                   landuseC1 <- relevel(landuseC, ref = "other"))  
RSF.Lupe2 <- glm(case_ ~ elevation + popden + landuseC1,  
                 data = Lupe.dat,  
                 weight = w,  
                 family = binomial)
```

329 The coefficients for **elevation** and **popden** do not change. Note, however, that the coefficient for  
330 **forest** is negative despite Lupe using **forest** more than its availability (i.e.,  $u(s, s \in forest) >$   
331  $a(s, s \in forest)$ ) and Lupe spending more than 95% of her time in the forest! What is going on?  
332 Remember, the coefficients for categorical predictors reflect use:availability ratios for each level of  
333 the predictor relative to the use:availability ratio for the reference class. The coefficient for **forest**  
334 is negative because the use:availability ratio for **forest** is less than the use:availability ratio for  
335 the reference class, **wet** (see Fig. 1). Depending on the reference level, it is possible to have a  
336 positive (negative) coefficient even when that landcover class is used more (less) than its availability.  
337 Furthermore, it is possible for landcover class to be used frequently but have a negative coefficient.

338 We have seen many ecologists, including some that are very quantitatively skilled and familiar with  
339 habitat-selection models, make mistakes when interpreting coefficients associated with categorical  
340 predictors! This example also highlights the importance of plotting your data (e.g., Fig. 1) and  
341 considering habitat availability when interpreting regression coefficients. Plotting distributions  
342 of covariates for both used and available locations is one of the best ways to understand fitted  
343 habitat-selection models, and is a good strategy to use for both continuous and categorical predictors  
344 (Merow, Smith, & Silander, 2013; Fieberg, Forester, et al., 2018).

### 345 Interactions Between Environmental Predictors

346 Consider the distribution of `elevation` at used and available locations across the different habitat  
347 classes (Fig. 3). We see that there is a wider range of `elevation` in `forest` and `wet` habitat  
348 compared to `grass` habitat, and there is a clear association between `elevation` and `landuseC`, with  
349 higher median `elevation` at used locations in `forest` and `grass` habitat relative to `wet` habitat.  
350 Perhaps more importantly, we also see that values of `elevation` are higher, on average for used  
351 locations (compared to available locations) in `forest` and `grass`, whereas the opposite is true in  
352 `wet` habitat. Although we should be skeptical of interactions that we discover while exploring our  
353 data (i.e., interactions that were not specified *a priori*), an analyst may be tempted to include an  
354 interaction between `elevation` and `landuseC`. In *Model 3* (Table 1), we revert to having `forest`  
355 as the reference level and include the interaction between `elevation` and `landuseC`.

```
Lupe.dat <- within(Lupe.dat , landuseC <- relevel(landuseC, ref = "forest"))  
RSF.Lupe3 <- glm(case_ ~ elevation + popden + landuseC + elevation:landuseC,  
                 data = Lupe.dat,  
                 weight = w,  
                 family = binomial)
```

356 Using this syntax, R creates two new variables `elevation:landuseCgrass` equal to `elevation`  
357 when `landuseC` is `grass` and is 0 otherwise and `elevation:landuseCwet` equal to `elevation` when  
358 `landuseC` is `wet` and is 0 otherwise. The coefficients associated with these predictors quantify  
359 the change in slope (i.e., change in the effect of `elevation`) when the locations fall in `grass` or  
360 `wet` relative to the slope when the locations fall in `forest`. Starting from eqn. (6) and using the

361 estimates for *Model 3* in Table 1, we can easily derive that the relative risk of choosing between two  
362 equally available locations that differ by 1 SD unit of `elevation` is equal to  $\exp(0.313) = 1.37$  when  
363 the two locations are in `forest`,  $\exp(0.313 + 0.112) = 1.53$  when the locations are in `grass`, and  
364  $\exp(0.313 - 0.499) = 0.83$  when the locations are in `wet` habitat. Thus, we might conclude that Lupe  
365 would select for higher elevations when in `forest` or `grass`, but avoid higher elevations when in  
366 `wet`. Alternatively, we can consider how `elevation` changes Lupe's view of the different landcover  
367 categories, noting that  $\beta_{grass} = -1.471 + 0.112\text{elevation}$  and  $\beta_{wet} = 0.183 - 0.499\text{elevation}$ .  
368 Thus, we see that Lupe's relative avoidance of `grass` (relative to `forest`) and selection for `wet`  
369 (relative to `forest`) both decline with `elevation`, and Lupe's inherent ranking of these 3 habitat  
370 types will change as `elevation` increases.

## 371 **Non-Linear Effects and Other Considerations**

372 When building models, it is important to consider the functional relationships between different  
373 environmental characteristics and habitat use. For example, we may classify available predictors  
374 based on whether they represent resources (higher values are generally preferable), risks (lower  
375 values are generally preferable) or conditions (values that are not too high or too low are preferable)  
376 (e.g., Matthiopoulos et al., 2015). It is often useful to allow for non-linear effects of conditions  
377 by including quadratic terms or using a set of spline basis functions. In either case, we end up  
378 requiring multiple coefficients to capture how relative risk changes with the environmental predictor.  
379 Consider, for example, that we could include a quadratic term to model the effect of `elevation`.  
380 Estimating the relative risk for two locations,  $s_1$  and  $s_2$ , that differ in their values of `elevation` but  
381 are otherwise equivalent would be straightforward using eqn. (6) - we would just need to calculate  
382 hazard ratios using coefficients for `elevation` and `elevation`<sup>2</sup>:

$$\frac{u(s_1)}{u(s_2)} = \frac{\exp(\text{elevation}(s_1)\beta_{\text{elevation}} + \text{elevation}(s_1)^2\beta_{\text{elevation}^2})}{\exp(\text{elevation}(s_2)\beta_{\text{elevation}} + \text{elevation}(s_2)^2\beta_{\text{elevation}^2})} \quad (12)$$

383 Lastly, we note that Avgar et al. (2017) provide simple formulas for calculating risk or hazard ratios  
384 under a number of different scenarios (e.g., models with quadratic polynomials, log-transformed  
385 covariates, and models with interactions). The `log_rss` function in the `amt` package (Signer et al.,



2019) relies on R's generic `predict` function to aid the user in calculating the log of these hazard ratios for any combination of model structure and two alternative locations; its use is illustrated in Supplementary Appendix B. Understanding how these formulas are derived, however, helps build intuition and frees the user to construct estimators and estimation targets that capture relevant quantities of specific interest.

## Statistical Independence

An important assumption of the IPP model, and hence, resource-selection functions, is that any clustering of spatial locations can be explained solely by spatial covariates. Strictly speaking, this assumption will almost never be met, particularly with modern-day telemetry studies that allow several locations to be collected on the same day. Telemetry observations close in time tend to also be close in space - i.e., telemetry observations exhibit serial dependence (Fleming et al., 2014). This serial dependence is likely to manifest itself in residual spatial autocorrelation that could be modeled using a spatial random effect or a spatial predictor constructed to account for the effects of movement constraints on habitat availability (Johnson, Hooten, & Kuhn, 2013). Models with spatial random effects are, however, more complicated and difficult to fit.

Alternatively, if telemetry observations are collected at regular time intervals, then the locations may be argued to provide a representative sample of habitat use from a specific observation window (Otis & White, 1999; Fieberg, 2007). In these cases, it may be helpful to view our estimates of the parameters in our resource-selection function,  $\hat{\beta}$ , as useful summaries of habitat use for tagged individuals during these fixed time periods. Nevertheless, the assumption of independence of our locations is clearly problematic and will lead to estimates of uncertainty that are on average too small. If we are primarily interested in population-level inferences, then we may choose to ignore within-individual autocorrelation when estimating individual-specific coefficients but use a robust form of SE that treats individuals as independent when describing uncertainty in population-level parameters (e.g., using a bootstrap; Fieberg, Vitense, & Johnson, 2020) or generalized estimating equations approach (e.g., Fieberg, Rieger, Zicus, & Schildcrout, 2009; Koper & Manseau, 2009; Fieberg, Matthiopoulos, Hebblewhite, Boyce, & Frair, 2010).

## 413 Step-Selection Functions

414 Step-selection functions were developed to deal with serial dependence as well as temporally varying  
415 availability distributions resulting from movement constraints (Fortin et al., 2005; Thurfjell et al.,  
416 2014). Rather than treat locations as independent and identically distributed (with availability that  
417 does not depend on time), step-selection analyses model transitions or “steps” connecting sequential  
418 locations ( $\Delta t$  units apart) in geographical space:

$$u(s, t + \Delta t) | u(s', t) = \frac{w(x(s); \beta(\Delta t)) \phi(s, s'; \gamma(\Delta t))}{\int_{\tilde{s} \in G} w(x(\tilde{s}), s'; \beta(\Delta t)) \phi(\tilde{s}, s'; \gamma(\Delta t)) d\tilde{s}} \quad (13)$$

419 where  $u(s, t + \Delta t) | u(s', t)$  gives the conditional probability of finding the individual at location  $s$  at  
420 time  $t + \Delta t$  given it was at location  $s'$  at time  $t$ ,  $w(x(s); \beta(\Delta t))$  is referred to as a step-selection  
421 function, and  $\phi(s, s'; \gamma(\Delta t))$  is a selection-independent movement kernel that describes how the  
422 animal would move in homogeneous habitat or in the absence of habitat selection (i.e., when  
423  $w(x(s); \beta(\Delta t)) = a$  constant for all  $s$ ). Note that we represent the parameter vectors ( $\beta$  and  $\gamma$ ) as  
424 functions of the step duration ( $\Delta t$ ). This notation reflects the fact that step-selection parameters  
425 are scale dependent (i.e., different  $\Delta t$ 's will result in different estimates of  $\beta$  and  $\gamma$ ; see Avgar et al.  
426 (2016) for more details). Thus, we generally require observations to be equally spaced in time, and  
427 care must be taken when comparing inference from models fitted at different temporal resolution  
428 (but see Munden et al., 2020).

429 As with resource-selection analyses, it is typical to model  $w(x(s); \beta(\Delta t))$  as a log-linear function of  
430 spatial covariates and regression parameters,  $w(x(s); \beta(\Delta t)) = \exp(X_1(s)\beta_1 + \dots X_p(s)\beta_p)$ . A key  
431 difference between resource-selection and step-selection analyses, however, is that the latter allow the  
432 available distribution to be time-dependent and equal to  $a(s, t + \Delta t) = \phi(s, s', \gamma(\Delta t))$ . Consequently,  
433 step-selection analyses allow explicit consideration of temporally dynamic environmental covariates,  
434  $x(s', t)$  and  $x(s, t + \Delta t)$  (and, possibly, environmental covariates measured along the path between  
435 these two locations). One option that often performs well and enhances interpretability is to include  
436 habitat covariates at the start of the movement step in the model for  $\phi$  and habitat covariates  
437 at the end of the movement step in the model for  $w$ , resulting in a more general formulation:  
438  $w(x(s, t + \Delta t); \beta(\Delta t)) \phi(s, s'; \gamma(\Delta t, x(s', t)))$ ; we provide an example in Supplementary Appendix B.

439 **Models for**  $\phi(s, s'; \gamma(\Delta t))$

440 Step-selection approaches build on an early idea by Arthur, Manly, McDonald, & Garner (1996)  
441 to model time-dependent availability via a circular buffer with radius  $R$  centered on the previous  
442 location. Rhodes et al. (2015) showed that this model is equivalent to assuming:

$$\phi(s, s'; \gamma(\Delta t)) = \begin{cases} \frac{1}{\pi R^2}, & \text{if } \|s - s'\| \leq R \\ 0, & \text{otherwise} \end{cases} \quad (14)$$

443 where  $\|s - s'\|$  is the Euclidean distance between locations  $s$  and  $s'$ , referred to as the *step length*.  
444 Rhodes et al. (2015) also demonstrated that circular buffers imply that individuals are more  
445 likely to move large distances than short distances since there is more area, and thus probability,  
446 associated with outer rings of the circle. Instead, they suggested using an exponential distribution  
447 to accommodate right-skewed step-length distributions and a tendency for animals to make shorter  
448 rather than longer movements:

$$\phi(s, s'; \gamma(\Delta t)) = \frac{\lambda \exp(-\lambda \|s - s'\|)}{2\pi \|s - s'\|} \quad (15)$$

449 Rather than specify a model directly in terms of  $\phi(s, s'; \gamma(\Delta t))$ , it is more common to see movement  
450 kernels specified in terms of the distribution of step lengths,  $d = \|s - s'\|$ , and turn angles (changes  
451 in direction from the previous bearing),  $\theta$ . In the sections that follow, we will let  $g(d; \gamma_d(\Delta t))$   
452 and  $f(\theta; \gamma_\theta(\Delta t))$  represent step-length and turn-angle distributions, respectively. Step-selection  
453 analyses frequently use either an exponential or gamma distribution for  $g(d; \gamma_d(\Delta t))$ . Turn angles  
454 may be assumed to be uniformly distributed as in Arthur et al. (1996) and Rhodes et al. (2015).  
455 Alternatively, circular distributions, such as the von Mises distribution or wrapped Cauchy or  
456 Weibull distributions, allow for a mode at 0 and can thus accommodate correlated movements (i.e.,  
457 sequential steps are assumed, on average, to follow in the same direction as the previous step).

458 Although step-length and turn-angle distributions are typically assumed to be independent, animals  
459 commonly exhibit a mix of of temporally persistent movement behaviors, ranging between high-  
460 displacement movements (e.g., when traveling between habitat patches, migrating, or dispersing)

461 and low-displacement movements (e.g., during foraging or resting bouts). If positional data are  
462 collected more frequently than the occurrence of behavioral switches, we might expect a negative cross-  
463 correlation between step lengths and turn angles (moving far is likely to coincide with moving straight)  
464 and a positive auto-correlation between the current and previous step lengths and turn angles.  
465 Moreover, as implied by the more flexible formulation,  $w(x(s, t + \Delta T); \beta(\Delta t)\phi(s, s'; \gamma(\Delta t, x(s', t))))$ ,  
466 both step-length and turn-angle distribution may shift as a function of spatial and/or temporal  
467 covariates such as habitat permeability (e.g., elevation ruggedness, snow depth, or vegetation  
468 density), time of day, season, and predation risk (Avgar, Mosser, Brown, & Fryxell, 2013; Avgar et  
469 al., 2016). Thus, although  $\phi$  is a “selection-independent” movement kernel, it may still depend on  
470 environmental or temporal covariates, and hence, may vary through space and time, resulting in  
471 both auto and cross correlations in step attributes.

472 Cross-correlation between step lengths and turn angles is difficult to model with common statistical  
473 distributions, but could be accommodated using copulae (Durante & Sempi, 2010). Alternatively,  
474 one could resample (i.e., bootstrap) step length and turn angle pairs,  $(d_t, \theta_t)$ , to preserve any  
475 correlation that is present in the data (Fortin et al., 2005). Although we generally find the bootstrap  
476 appealing (Fieberg et al., 2020), it has limitations in this context. In particular, the observed  
477 distribution of step lengths and turn angles will reflect both inherent movement characteristics of  
478 the species (captured by  $\phi$ ) as well as habitat selection (captured by  $w$ ). Using the observed steps as  
479 a non-parametric model for  $\phi$  without adjustment for the effect of  $w$  can result in biased estimates  
480 of  $\beta$  (Forester, Im, & Rathouz, 2009). We will return to this point in the next section. As mentioned  
481 previously (see **Statistical Independence**), and regardless of the source of correlation, it may  
482 be preferable to calculate robust SEs by treating individuals as the relevant sampling unit when  
483 performing population-level inference (e.g., Prima, Duchesne, & Fortin, 2017). Lastly, cross- and  
484 auto-correlations in step lengths and turn angles, as well as their dependencies on various temporal  
485 or environmental characteristics, could be modeled parametrically using an integrated step-selection  
486 function (Avgar et al., 2016). To do so, we need to include appropriate statistical interactions (e.g.,  
487 between concurrent and previous step lengths/turn angles and between these step-attributes and  
488 environmental or temporal covariates). We discuss this process further below, and provide examples  
489 in the Supplementary Appendix B. See also Prokopenko, Boyce, & Avgar (2017), Scraftford, Avgar,

490 Heeres, & Boyce (2018), and Dickie, McNay, Sutherland, Cody, & Avgar (2020).

## 491 **Estimation of Movement and Habitat-Selection Parameters**

492 Although it is possible to simultaneously estimate movement ( $\gamma$ ) and habitat selection ( $\beta$ ) parameters  
493 using maximum likelihood (e.g., Rhodes et al., 2015) or Bayesian methods (e.g., Johnson et al.,  
494 2008), this is rarely done in practice as it would require custom-written code. Instead, it is common  
495 to use the following approach:

- 496 1. Estimate or approximate  $\phi(s, s'; \gamma(\Delta t))$  using observed step lengths and turn angles, giving  
497  $\hat{\phi}(s, s'; \hat{\gamma}(\Delta t))$ .
- 498 2. Generate time-dependent available locations by simulating potential movements from the  
499 previously observed location,  $u(t, s')$ . Similar to applications of RSFs, it is up to the user to  
500 decide how many available locations to sample for each used location, and, due to similar  
501 considerations (properly approximating the availability domain:  $a(s, t + \Delta t) = \phi(s, s'; \gamma(\Delta t))$ ,  
502 the more points the merrier.
- 503 3. Estimate  $\beta$  using conditional logistic regression, with strata formed by combining time-  
504 dependent used and available locations.

505 If we knew  $\phi(s, s', \gamma(\Delta t))$  and could simulate directly from it (skipping step 1), then this approach  
506 would provide unbiased estimates of  $\beta$  (Forester et al., 2009). However, as mentioned in the previous  
507 section, estimating  $\phi(s, s'; \gamma(\Delta t))$  from observed steps without adjusting for  $w(x(s); \beta(\Delta t))$  can lead  
508 to biased estimates of  $\gamma$  and  $\beta$ .

509 Forester et al. (2009) considered the case where the step-length distribution,  $g(d, \gamma_d)$ , is given by  
510 an exponential distribution with unknown parameter,  $\lambda$ . They showed that estimating  $\lambda$  directly  
511 from the observed distribution of step lengths (without adjusting for the effect of  $w(x(s); \beta)$ ), and  
512 then proceeding with steps 2 and 3 results in a biased estimators of  $\beta$ , but that the bias (if  $g(d, \gamma_d)$   
513 is given by an exponential distribution) is eliminated if  $\log(d_t)$  is included as a predictor in the  
514 model. Avgar et al. (2016) further showed that the coefficient associated with  $\log(d_t)$  could be  
515 used to modify  $\hat{\lambda}$ , leading to an unbiased estimator of  $\lambda$  and thus,  $g(d, \gamma_d)$ . In addition, they  
516 showed how similar adjustments could be used to obtain unbiased estimators of step-length ( $\gamma_d$ )  
517 and habitat-selection ( $\beta$ ) parameters when the distribution of step lengths is given by a gamma,

518 half-normal, or log-normal distribution. Similarly, Duchesne, Fortin, & Rivest (2015) showed that  
519 including  $\cos(\theta)$  as a predictor can lead to unbiased estimators of turn angle parameters ( $\gamma_\theta$ ) when  
520 the distribution of turn angles follows a von Mises distribution. These adjustments are available  
521 in the `amt` package for the exponential, gamma, and von Mises distributions (Signer et al., 2019).  
522 Avgar et al. (2016) coined the term *integrated* step-selection analysis to emphasize that these  
523 results provide new opportunities to model both movement and habitat selection via tried and true  
524 statistical software for fitting conditional logistic regression models.

525 In Supplementary Appendix B, we provide a “How to” guide for implementing an integrated  
526 step-selection analysis using the `amt` package in R (R Core Team, 2019; Signer et al., 2019).  
527 Conducting an integrated step-selection analysis requires, in addition to the 3 steps outlined in  
528 this section, that we add a fourth step that re-estimates the movement parameters in  $\phi(s, s'; \gamma(\Delta t))$   
529 using regression coefficients associated with movement characteristics (e.g.,  $\log(d_t)$ ,  $\cos(\theta)$ ). This  
530 last step adjusts the parameters in  $\phi(s, s'; \gamma(\Delta t))$  to account for the effect of habitat selection  
531 when estimating the movement kernel (Avgar et al., 2016); this step is unnecessary if no inference  
532 about movement is being made. Importantly, interactions may be included between movement  
533 characteristics (e.g.,  $\log(d_t)$ ,  $\cos(\theta)$ ) and environmental covariates,  $x(s', t)$ , to allow the movement  
534 kernel to depend on the environment. When interactions are included, step 4 results in a movement  
535 kernel,  $\phi(s, s'; \gamma(\Delta t, x(s', t)))$ , that depends on the habitat the animal is in at the start of the  
536 movement step (Fig. 4).

### 537 **Interpretation of Parameters in an Integrated Step-Selection Analysis**

538 The habitat-selection parameters can be interpreted in the same way as parameters in resource-  
539 selection functions (i.e., as spatial hazards, assuming locations are equally available and differing  
540 in terms of a single habitat covariate). Hence, the  $\ln(RSS)$  expressions in Avgar et al. (2017),  
541 and the `log_rss` function in `amt`, are suitable for calculating and interpreting the effects of the  
542 various habitat covariates. However, it is important to recognize that the used and available  
543 distributions in step-selection analyses are dynamic and non-uniform in space. In particular, they  
544 depend on an individual’s current location and movement tendencies (as well as the observed time scale  
545 determined by  $\Delta t$ ; Barnett & Moorcroft, 2008; Signer, Fieberg, & Avgar, 2017). Thus, questions

546 that require integrating hazards over space (e.g., eqn. (10)) are more difficult to address, but may be  
547 computed using simulation modeling (Signer et al., 2017), by solving the master equation (formed by  
548 multiplying the right hand side of eqn. (13) by  $u(s', t)$  and then integrating over  $G$  with respect to  $s'$ )  
549 for its steady state (Potts et al., 2014a, 2014b), or in some cases, by translating the fitted model into a  
550 partial differential equation model with analytical steady-state distribution (Potts & Schlägel, 2020).  
551 We also note that alternative modeling frameworks exist with parameters that directly describe  
552 long-term relative risk (e.g., Michelot et al., 2019b, 2019a; Michelot, Blackwell, Chamaillé-Jammes,  
553 & Matthiopoulos, 2020), but these methods are more computationally challenging to implement,  
554 and therefore, less likely to be widely used in applied settings. The `amt` package has a basic capacity  
555 to simulate the utilization distribution based on a parameterized integrated step-selection function  
556 (Signer et al., 2017), and we expect this approach to become more flexible in the near future.

557 Using an integrated step-selection approach (e.g., as in Fig. (???)*(fig:movekern)*), it is also possible  
558 to draw ecological inference using the selection-free movement kernel. For example, the fitted  
559 step-length and turn-angle distributions can tell us how much more likely an animal is to take large  
560 versus small steps or to turn left or right relative to moving straight. We can also calculate moments  
561 of these distributions under different environmental conditions, which can be informative when our  
562 models include interactions between movement characteristics and environmental predictors. For  
563 example, we could calculate the expected selection-free displacement rates (and/or directionality)  
564 as function of local snow depth (that is, if snow depth was included in our model as an interaction  
565 with step length). To calculate these expected values we must first adjust the ‘tentative’ parameters  
566 used to sample available steps (e.g., if we use a gamma distribution, the tentative shape and scale  
567 parameters) using the coefficient estimates obtained for step length (and/or its transformation) and  
568  $\cos(\text{turn angle})$ . The details of how to carry on these adjustments are provided in Supplementary  
569 Appendix C and in Avgar et al. (2016). Once the selection-free movement parameters are obtained,  
570 one can use them to calculate various aspects of the (theoretical) distributions of step lengths and  
571 turn angles, such as the mean, the median, or the 95% confidence bounds (see Supplementary  
572 Appendix B for examples).

## 573 Discussion

574 We have highlighted how connecting resource-selection functions to IPP models and weighted  
575 distribution theory helps with interpreting parameters in resource-selection functions using simple  
576 examples. We have also reviewed step-selection analyses and demonstrated how to estimate  
577 movement and habitat-selection parameters when conducting an integrated step-selection analysis  
578 using the `amt` package. So far, we have focused on interpreting results when analyzing data from a  
579 single individual. We end with a brief discussion addressing statistical dependencies, particularly  
580 when analyzing data from multiple individuals, along with issues related to model transferability  
581 and parameter sensitivity to changes in habitat availability and species population density.

### 582 Statistical Dependencies

583 Earlier, we highlighted the importance of statistical independence as it applies to individual locations  
584 when estimating resource-selection functions. We also noted that step-selection analyses typically  
585 assume step lengths and turn angles are independent of each other and also over time, though it is  
586 possible to account for these correlations using appropriate interactions (e.g., between step length  
587 at time  $t$  and time  $t - 1$ , step length and turn angle both at time  $t$ ). It would be nice to have  
588 multivariate distributions available that are capable of describing correlated step lengths and turn  
589 angles and any inherent autocorrelation. It is plausible, however, that models that allow movement  
590 parameters to vary by habitat type, using interactions between step length, turn angle, and habitat  
591 covariates, will be able to account for much of the autocorrelation and cross-correlation (between  
592 step lengths and turn angles) present in the data. Similarly, autocorrelation and cross-correlations  
593 may be accommodated by models that include a (possibly latent) behavioral state, with movement  
594 and habitat-selection parameters that are state-dependent (Nicosia, Duchesne, Rivest, Fortin, &  
595 others, 2017; Suraci et al., 2019).

596 In addition to cross-correlation between step lengths and turn angles and serial dependencies,  
597 individuals living in different environments may exhibit different habitat-selection patterns and thus,  
598 repeated observations on the same set of individuals will induce further statistical dependencies.  
599 A simple strategy for dealing with repeated measures when individuals can be assumed to be  
600 independent is to fit models to individual animals and then treat the resulting coefficients as data



601 when inferring population-level patterns (Murtaugh, 2007; Fieberg et al., 2010). For example,  
602 sample means of the regression coefficients can be used to characterize average habitat-selection  
603 parameters. Estimating among-animal variability is trickier due to sampling error; naively ignoring  
604 sampling error will lead to a positive bias in estimates of among-animal variability, but more formal  
605 two-step methods can address this issue (Craiu, Duchesne, Fortin, & Baillargeon, 2011, 2016; Dickie  
606 et al., 2020). Alternatively, generalized linear mixed models with random coefficients can be used to  
607 quantify among-animal variability in resource-selection and step-selection analyses (Muff, Signer, &  
608 Fieberg, 2020).

609 Although it is possible to conduct integrated step-selection analyses with hierarchical models  
610 containing random effects, we have much to learn about how these approaches perform in practice.  
611 For example, Muff et al. (2020) found that parameters describing among-animal variability in  
612 habitat-selection parameters were biased low when movement characteristics were included in  
613 the model. Mixed-effect models with random coefficients are also “parameter hungry”, requiring  
614  $p(p + 1)/2$  variance and covariance parameters to be estimated, where  $p$  is the number of random  
615 coefficients. Models that allow all coefficients to be animal-specific and to covary are thus likely  
616 to be computationally challenging to fit and problematic for small data sets containing only a few  
617 individuals. For this reason, Muff et al. (2020) assumed coefficients did not covary in their applied  
618 examples. In the context of our fisher analysis, this equates to assuming that knowing an individual’s  
619 coefficient for `popden` tells us nothing about that animal’s parameters for `elevation` or `landuseC`  
620 variables. For categorical variables, it is natural to expect parameters to have a negative covariance  
621 (since, for example, spending more time in `forest` must come at the expense of spending less time  
622 in other landuse categories). Research evaluating the performance of mixed-effect step-selection  
623 analyses under various data-generating scenarios would be helpful for evaluating robustness to  
624 assumption violations (e.g., those regarding the distribution of random parameters).

## 625 **Sensitivity of Selection Coefficients to Species Population Density and Habitat** 626 **Availability**

627 Before concluding, we feel it is important to briefly discuss the oft observed pattern of density  
628 and availability dependence in habitat-selection inference (Mysterud & Ims, 1998; Matthiopoulos,

629 Hebblewhite, Aarts, & Fieberg, 2011; Matthiopoulos et al., 2015). Density-dependent inference  
630 may be observed when the same analysis is applied to individuals or populations of the same  
631 species, under similar environmental conditions, but at different population densities. Availability  
632 dependence (also referred to as a “functional response”) may be observed when the same analysis is  
633 applied to individuals or populations of the same species, which experience different landscape-scale  
634 resource or habitat availabilities. For example, van Beest, McLoughlin, Mysterud, & Brook (2016),  
635 found that individual elk display availability-dependent resource-selection patterns (switching from  
636 selection to avoidance of certain habitats as function of the availability of these habitats within  
637 their home range), but that the strength of this functional response depended on elk population  
638 density. Such context dependencies are in fact so common that we do not know of a single instance  
639 where researchers were looking for them and failed to find them. Recently, Avgar, Betini, & Fryxell  
640 (2020) showed that such context dependencies in habitat-selection patterns are expected to emerge  
641 even under the simplest theoretical model of an Ideal Free Distribution (Fretwell, 1969). Thus,  
642 habitat-selection models often have poor predictive capacity when transferred across different study  
643 areas, or even within the same area over time (e.g., Torres et al., 2015). Yet, these differences may  
644 also be exploited; modeling frameworks that leverage data from multiple environments and across a  
645 range of population densities can potentially increase predictive capabilities (Matthiopoulos, Field,  
646 & MacLeod, 2019). As with any other attempt to model complex ecological data, critical evaluation  
647 of model performance for both within and out-of-sample data is essential (Fieberg, Forester, et al.,  
648 2018).

## 649 **Authors’ Contributions**

650 JF developed the idea for the review, led the writing of the manuscript, and drafted the initial  
651 version of Supplementary Appendix A; B.S. and J.S. drafted the initial version of Supplementary  
652 Appendix B; B.S. and T.A. drafted the initial version of Supplementary Appendix C. All authors  
653 contributed critically to the manuscript text and Additional Files, and gave final approval for  
654 publication.

## 655 Acknowledgements

656 We thank J.R. Potts for helpful comments on a previous draft. JF received partial salary support  
657 from the Minnesota Agricultural Experimental Station. TA received partial salary support from the  
658 Utah Agricultural Experimental Station.

## 659 Data Availability

660 All of the data used in this paper are available from within the `amt` package (Signer et al., 2019).

## 661 References

- 662 Aarts, G., Fieberg, J., & Matthiopoulos, J. (2012). Comparative interpretation of count, presence–  
663 absence and point methods for species distribution models. *Methods in Ecology and Evolution*, *3*(1),  
664 177–187.
- 665 Aarts, G., MacKenzie, M., McConnell, B., Fedak, M., & Matthiopoulos, J. (2008). Estimating  
666 space-use and habitat preference from wildlife telemetry data. *Ecography*, *31*(1), 140–160.
- 667 Arthur, S. M., Manly, B. F., McDonald, L. L., & Garner, G. W. (1996). Assessing habitat selection  
668 when availability changes. *Ecology*, *77*(1), 215–227.
- 669 Avgar, T., Betini, G. S., & Fryxell, J. M. (2020). Habitat selection patterns are density-dependent  
670 under the Ideal Free Distribution. *Journal of Animal Ecology*.
- 671 Avgar, T., Lele, S. R., Keim, J. L., & Boyce, M. S. (2017). Relative selection strength: Quantifying  
672 effect size in habitat-and step-selection inference. *Ecology and Evolution*, *7*(14), 5322–5330.
- 673 Avgar, T., Mosser, A., Brown, G. S., & Fryxell, J. M. (2013). Environmental and individual drivers  
674 of animal movement patterns across a wide geographical gradient. *Journal of Animal Ecology*, *82*(1),  
675 96–106.
- 676 Avgar, T., Potts, J. R., Lewis, M. A., & Boyce, M. S. (2016). Integrated step selection analysis:  
677 Bridging the gap between resource selection and animal movement. *Methods in Ecology and*  
678 *Evolution*, *7*(5), 619–630.

- 679 Barnett, A. H., & Moorcroft, P. R. (2008). Analytic steady-state space use patterns and rapid  
680 computations in mechanistic home range analysis. *Journal of Mathematical Biology*, *57*(1), 139–159.
- 681 Boyce, M. S., & McDonald, L. L. (1999). Relating populations to habitats using resource selection  
682 functions. *Trends in Ecology & Evolution*, *14*(7), 268–272.
- 683 Boyce, M. S., Vernier, P. R., Nielsen, S. E., Schmiegelow, F. K. A., Mark S.Boyce, Pierre R.Vernier,  
684 . . . Fiona K.A.Schmiegelow. (2002). Evaluating resource selection functions. *Ecological Modelling*,  
685 *157*(2), 281–300. doi:10.1016/S0304-3800(02)00200-4
- 686 Chamaille-Jammes, S. (2019). A reformulation of the selection ratio shed light on resource selection  
687 functions and leads to a unified framework for habitat selection studies. *bioRxiv*. doi:10.1101/565838
- 688 Craiu, R., Duchesne, T., Fortin, D., & Baillargeon, S. (2016). TwoStepCLogit: Conditional logistic  
689 regression: A two-step estimation method. R package version 1.2. 5.
- 690 Craiu, R. V., Duchesne, T., Fortin, D., & Baillargeon, S. (2011). Conditional logistic regression  
691 with longitudinal follow-up and individual-level random coefficients: A stable and efficient two-step  
692 estimation method. *Journal of Computational and Graphical Statistics*, *20*(3), 767–784.
- 693 Cressie, N. (1992). Statistics for spatial data. *Terra Nova*, *4*(5), 613–617.
- 694 Defourny, P., Schouten, L., Bartalev, S., Bontemps, S., Cacetta, P., De Wit, A., . . . others. (2009).  
695 Accuracy assessment of a 300 m global land cover map: The GlobCover Experience.
- 696 Dickie, M., McNay, S. R., Sutherland, G. D., Cody, M., & Avgar, T. (2020). Corridors or risk?  
697 Movement along, and use of, linear features varies predictably among large mammal predator and  
698 prey species. *Journal of Animal Ecology*, *89*(2), 623–634.
- 699 Dodge, S., Bohrer, G., Weinzierl, R., Davidson, S. C., Kays, R., Douglas, D., . . . Wikelski, M.  
700 (2013). The environmental-data automated track annotation (env-data) system: Linking animal  
701 tracks with environmental data. *Movement Ecology*, *1*(1), 3.
- 702 Duchesne, T., Fortin, D., & Rivest, L.-P. (2015). Equivalence between step selection functions and  
703 biased correlated random walks for statistical inference on animal movement. *PLoS One*, *10*(4).
- 704 Durante, F., & Sempì, C. (2010). Copula theory: An introduction. In *Copula theory and its*

705 *applications* (pp. 3–31). Springer.

706 Elith, J., & Leathwick, J. R. (2009). Species distribution models: Ecological explanation and  
707 prediction across space and time. *Annual Review of Ecology, Evolution, and Systematics*, *40*(1),  
708 677.

709 Elith, J., Phillips, S. J., Hastie, T., Dudik, M., Chee, Y. E., & Yates, C. J. (2011). A statistical  
710 explanation of MaxEnt for ecologists. *Diversity and Distributions*, *17*(1), 43–57.

711 Fieberg, J. (2007). Kernel density estimators of home range: Smoothing and the autocorrelation  
712 red herring. *Ecology*, *88*(4), 1059–1066.

713 Fieberg, J., Bohrer, G., Davidson, S., & Kays, R. (2018). Short course on analyzing animal tracking  
714 data. Presented at the North Carolina Museum of Natural Sciences, Raleigh, NC, USA. May 21–23,  
715 2018. <https://movebankworkshopraleighnc.netlify.com/index.html>.

716 Fieberg, J., Forester, J. D., Street, G. M., Johnson, D. H., ArchMiller, A. A., & Matthiopoulos, J.  
717 (2018). Used-habitat calibration plots: A new procedure for validating species distribution, resource  
718 selection, and step-selection models. *Ecography*, *41*(5), 737–752.

719 Fieberg, J., Matthiopoulos, J., Hebblewhite, M., Boyce, M. S., & Frair, J. L. (2010). Correlation  
720 and studies of habitat selection: Problem, red herring or opportunity? *Philosophical Transactions*  
721 *of the Royal Society of London B: Biological Sciences*, *365*(1550), 2233–2244.

722 Fieberg, J., Rieger, R. H., Zicus, M. C., & Schildcrout, J. S. (2009). Regression modelling of  
723 correlated data in ecology: Subject-specific and population averaged response patterns. *Journal of*  
724 *Applied Ecology*, *46*(5), 1018–1025.

725 Fieberg, J. R., Vitense, K., & Johnson, D. H. (2020). Resampling-based methods for biologists.  
726 *PeerJ*, *8*, e9089.

727 Fithian, W., & Hastie, T. (2013). Finite-sample equivalence in statistical models for presence-only  
728 data. *The Annals of Applied Statistics*, *7*(4), 1917.

729 Fleming, C. H., Calabrese, J. M., Mueller, T., Olson, K. A., Leimgruber, P., & Fagan, W. F. (2014).  
730 From fine-scale foraging to home ranges: A semivariance approach to identifying movement modes

- 731 across spatiotemporal scales. *The American Naturalist*, 183(5), E154–E167.
- 732 Forester, J. D., Im, H. K., & Rathouz, P. J. (2009). Accounting for animal movement in estimation  
733 of resource selection functions: Sampling and data analysis. *Ecology*, 90(12), 3554–3565.
- 734 Fortin, D., Beyer, H. L., Boyce, M. S., Smith, D. W., Duchesne, T., & Mao, J. S. (2005). Wolves  
735 influence elk movements: Behavior shapes a trophic cascade in Yellowstone National Park. *Ecology*,  
736 86(5), 1320–1330.
- 737 Fretwell, S. D. (1969). On territorial behavior and other factors influencing habitat distribution in  
738 birds. *Acta Biotheoretica*, 19(1), 45–52.
- 739 Guisan, A., Thuiller, W., & Zimmermann, N. E. (2017). *Habitat suitability and distribution models:  
740 With applications in R*. Cambridge University Press.
- 741 Hirzel, A. H., & Le Lay, G. (2008). Habitat suitability modelling and niche theory. *Journal of  
742 Applied Ecology*, 45(5), 1372–1381.
- 743 Hooten, M. B., Hanks, E. M., Johnson, D. S., & Alldredge, M. W. (2013). Reconciling resource  
744 utilization and resource selection functions. *Journal of Animal Ecology*, 82(6), 1146–1154.
- 745 Hooten, M. B., Johnson, D. S., McClintock, B. T., & Morales, J. M. (2017). *Animal movement:  
746 Statistical models for telemetry data*. CRC press.
- 747 Hosmer, D. W., Lemeshow, S., & Sturdivant, R. X. (2013). *Applied logistic regression* (Vol. 398).  
748 John Wiley & Sons.
- 749 Johnson, C. J., Nielsen, S. E., Merrill, E. H., McDonald, T. L., & Boyce, M. S. (2006). Resource  
750 selection functions based on use-availability data: Theoretical motivation and evaluation methods.  
751 *Journal of Wildlife Management*, 70(2), 347–357.
- 752 Johnson, D. H. (1980). The comparison of usage and availability measurements for evaluating  
753 resource preference. *Ecology*, 61(1), 65–71.
- 754 Johnson, D. S., Hooten, M. B., & Kuhn, C. E. (2013). Estimating animal resource selection from  
755 telemetry data using point process models. *Journal of Animal Ecology*, 82(6), 1155–1164.
- 756 Johnson, D. S., Thomas, D. L., Ver Hoef, J. M., & Christ, A. (2008). A general framework

- 757 for the analysis of animal resource selection from telemetry data. *Biometrics*, *64*(3), 968–76.  
758 doi:10.1111/j.1541-0420.2007.00943.x
- 759 Kays, R., Crofoot, M. C., Jetz, W., & Wikelski, M. (2015). Terrestrial animal tracking as an eye on  
760 life and planet. *Science*, *348*(6240), aaa2478.
- 761 Keating, K. A., & Cherry, S. (2004). Use and interpretation of logistic regression in habitat-selection  
762 studies. *Journal of Wildlife Management*, *68*(4), 774–789.
- 763 Kéry, M. (2010). *Introduction to WinBUGS for ecologists: Bayesian approach to regression, ANOVA,*  
764 *mixed models and related analyses*. Academic Press.
- 765 Koper, N., & Manseau, M. (2009). Generalized estimating equations and generalized linear  
766 mixed-effects models for modelling resource selection. *Journal of Applied Ecology*, *46*(3), 590–599.  
767 doi:10.1111/j.1365-2664.2009.01642.x
- 768 LaPoint, S., Gallery, P., Wikelski, M., & Kays, R. (2013a). Animal behavior, cost-based corridor  
769 models, and real corridors. *Landscape Ecology*, *28*(8), 1615–1630.
- 770 LaPoint, S., Gallery, P., Wikelski, M., & Kays, R. (2013b). Data from: Animal behavior, cost-based  
771 corridor models, and real corridors. *Movebank Data Repository*. doi:10.5441/001/1.2tp2j43g
- 772 Lele, S. R., & Keim, J. L. (2006). Weighted distributions and estimation of resource selection  
773 probability functions. *Ecology*, *87*(12), 3021–3028.
- 774 Lele, S. R., Merrill, E. H., Keim, J., & Boyce, M. S. (2013). Selection, use, choice and occupancy:  
775 Clarifying concepts in resource selection studies. *Journal of Animal Ecology*, *82*(6), 1183–1191.
- 776 Manly, B., McDonald, L., Thomas, D., McDonald, T. L., & Erickson, W. P. (2002). *Resource*  
777 *selection by animals: Statistical design and analysis for field studies*. Springer Science & Business  
778 Media.
- 779 Matthiopoulos, J., Fieberg, J., Aarts, G., Beyer, H. L., Morales, J. M., & Haydon, D. T. (2015).  
780 Establishing the link between habitat selection and animal population dynamics. *Ecological Mono-*  
781 *graphs*, *85*(3), 413–436. doi:10.1890/14-2244.1
- 782 Matthiopoulos, J., Field, C., & MacLeod, R. (2019). Predicting population change from models based

783 on habitat availability and utilization. *Proceedings of the Royal Society B*, 286(1901), 20182911.

784 Matthiopoulos, J., Hebblewhite, M., Aarts, G., & Fieberg, J. (2011). Generalized functional  
785 responses for species distributions. *Ecology*, 92(3), 583–589.

786 Merow, C., Smith, M. J., & Silander, J. A. (2013). A practical guide to maxent for modeling species'  
787 distributions: What it does, and why inputs and settings matter. *Ecography*, 36(10), 1058–1069.

788 Michelot, T., Blackwell, P. G., Chamaillé-Jammes, S., & Matthiopoulos, J. (2020). Inference in  
789 MCMC step selection models. *Biometrics*, 76(2), 438–447.

790 Michelot, T., Blackwell, P. G., & Matthiopoulos, J. (2019a). Linking resource selection and step  
791 selection models for habitat preferences in animals. *Ecology*, 100(1).

792 Michelot, T., Gloaguen, P., Blackwell, P. G., & Étienne, M.-P. (2019b). The langevin diffusion  
793 as a continuous-time model of animal movement and habitat selection. *Methods in Ecology and*  
794 *Evolution*, 10(11), 1894–1907.

795 Millspaugh, J. J., Nielson, R. M., McDONALD, L., Marzluff, J. M., Gitzen, R. A., Rittenhouse,  
796 C. D., . . . Sheriff, S. L. (2006). Analysis of resource selection using utilization distributions. *The*  
797 *Journal of Wildlife Management*, 70(2), 384–395.

798 Muff, S., Signer, J., & Fieberg, J. (2020). Accounting for individual-specific variation in habitat-  
799 selection studies: Efficient estimation of mixed-effects models using bayesian or frequentist compu-  
800 tation. *Journal of Animal Ecology*, 89(1), 80–92.

801 Munden, R., Borger, L., Wilson, R. P., Redcliffe, J., Brown, R., Garel, M., & Potts, J. R. (2020).  
802 Why did the animal turn? Time-varying step selection analysis for inference between observed  
803 turning points in high frequency data. *bioRxiv*.

804 Murtaugh, P. A. (2007). Simplicity and complexity in ecological data analysis. *Ecology*, 88(1),  
805 56–62.

806 Mysterud, A., & Ims, R. A. (1998). Functional responses in habitat use: Availability influences  
807 relative use in trade-off situations. *Ecology*, 79(4), 1435–1441.

808 Nicosia, A., Duchesne, T., Rivest, L.-P., Fortin, D., & others. (2017). A multi-state conditional



- 809 logistic regression model for the analysis of animal movement. *The Annals of Applied Statistics*,  
810 *11*(3), 1537–1560.
- 811 Otis, D. L., & White, G. C. (1999). Autocorrelation of location estimates and the analysis of  
812 radiotracking data. *The Journal of Wildlife Management*, 1039–1044.
- 813 Phillips, S. J., & Dudík, M. (2008). Modeling of species distributions with Maxent: New extensions  
814 and a comprehensive evaluation. *Ecography*, *31*(2), 161–175.
- 815 Potts, J. R., Bastille-Rousseau, G., Murray, D. L., Schaefer, J. A., & Lewis, M. A. (2014a). Predicting  
816 local and non-local effects of resources on animal space use using a mechanistic step selection model.  
817 *Methods in Ecology and Evolution*, *5*(3), 253–262. doi:10.1111/2041-210X.12150
- 818 Potts, J. R., Mokross, K., Stouffer, P. C., & Lewis, M. A. (2014b). Step selection techniques  
819 uncover the environmental predictors of space use patterns in flocks of amazonian birds. *Ecology*  
820 *and Evolution*, *4*(24), 4578–4588.
- 821 Potts, J. R., & Schlägel, U. E. (2020). Parametrising diffusion-taxis equations from animal movement  
822 trajectories using step selection analysis. *Methods in Ecology and Evolution*.
- 823 Prima, M.-C., Duchesne, T., & Fortin, D. (2017). Robust inference from conditional logistic  
824 regression applied to movement and habitat selection analysis. *PloS One*, *12*(1).
- 825 Prokopenko, C. M., Boyce, M. S., & Avgar, T. (2017). Characterizing wildlife behavioural responses  
826 to roads using integrated step selection analysis. *Journal of Applied Ecology*, *54*(2), 470–479.
- 827 R Core Team. (2019). *R: A language and environment for statistical computing*. Vienna, Austria:  
828 R Foundation for Statistical Computing. Retrieved from <https://www.R-project.org/>
- 829 Renner, I. W., Elith, J., Baddeley, A., Fithian, W., Hastie, T., Phillips, S. J., . . . Warton, D. I.  
830 (2015). Point process models for presence-only analysis. *Methods in Ecology and Evolution*, *6*(4),  
831 366–379.
- 832 Rhodes, J. R., Mcalpine, C. A., Lunney, D., Possingham, H. P., Ecology, S., & May, N. (2015). A  
833 spatially explicit habitat selection model incorporating. *Ecology*, *86*(5), 1199–1205. doi:10.1890/04-  
834 0912

- 835 Robinson, O. J., Ruiz-Gutierrez, V., Reynolds, M. D., Golet, G. H., Strimas-Mackey, M., & Fink, D.  
836 (2020). Integrating citizen science data with expert surveys increases accuracy and spatial extent of  
837 species distribution models. *Diversity and Distributions*.
- 838 Scrafford, M. A., Avgar, T., Heeres, R., & Boyce, M. S. (2018). Roads elicit negative movement and  
839 habitat-selection responses by wolverines (*gulo gulo luscus*). *Behavioral Ecology*, *29*(3), 534–542.
- 840 Signer, J., & Fieberg, J. (2020). A fresh look at an old concept: Home-range estimation in a tidy  
841 world. *bioRxiv*.
- 842 Signer, J., Fieberg, J., & Avgar, T. (2017). Estimating utilization distributions from fitted step-  
843 selection functions. *Ecosphere*, *8*(4). doi:10.1002/ecs2.1771
- 844 Signer, J., Fieberg, J., & Avgar, T. (2019). Animal movement tools (amt): R package for managing  
845 tracking data and conducting habitat selection analyses. *Ecology and Evolution*, (July 2018),  
846 880–890. doi:10.1002/ece3.4823
- 847 Suraci, J. P., Frank, L. G., Oriol-Cotterill, A., Ekwanga, S., Williams, T. M., & Wilmers, C. C.  
848 (2019). Behavior-specific habitat selection by african lions may promote their persistence in a  
849 human-dominated landscape. *Ecology*, *100*(4), e02644.
- 850 Thurfjell, H., Ciuti, S., & Boyce, M. S. (2014). Applications of step-selection functions in ecology  
851 and conservation. *Movement Ecology*, *2*(4).
- 852 Torres, L. G., Sutton, P. J., Thompson, D. R., Delord, K., Weimerskirch, H., Sagar, P. M., ...  
853 Phillips, R. A. (2015). Poor transferability of species distribution models for a pelagic predator,  
854 the grey petrel, indicates contrasting habitat preferences across ocean basins. *PLoS One*, *10*(3),  
855 e0120014.
- 856 University, C. for I. E. S. I. N. .. C. .. C., & CIAT, C. I. de A. T. .. (2005, 20190227). Gridded popu-  
857 lation of the world, version 3 (gpwv3): Population density grid. Palisades, NY: NASA Socioeconomic  
858 Data; Applications Center (SEDAC). Retrieved from <https://doi.org/10.7927/H4XK8CG2>
- 859 U. S. / Japan ASTER Science Team. (2009). ASTER global digital elevation model data set. NASA  
860 eosdis land processes daac. [https://lpdaac.usgs.gov/dataset\\_discovery/aster/aster\\_products\\_](https://lpdaac.usgs.gov/dataset_discovery/aster/aster_products_)  
861 [table/astgtm\\_v002](https://lpdaac.usgs.gov/dataset_discovery/aster/aster_products_table/astgtm_v002). doi:10.5067/ASTER/ASTGTM.002

- 862 van Beest, F. M., McLoughlin, P. D., Mysterud, A., & Brook, R. K. (2016). Functional responses in  
863 habitat selection are density dependent in a large herbivore. *Ecography*, *39*(6), 515–523.
- 864 Van Winkle, W. (1975). Comparison of several probabilistic home-range models. *The Journal of*  
865 *Wildlife Management*, 118–123.
- 866 Warton, D. I., & Shepherd, L. C. (2010). Poisson point process models solve the ‘pseudo-absence  
867 problem’ for presence-only data in ecology. *The Annals of Applied Statistics*, *4*(3), 1383–1402.
- 868 Worton, B. J. (1989). Kernel methods for estimating the utilization distribution in home-range  
869 studies. *Ecology*, *70*(1), 164–168.
- 870 Yates, K. L., Bouchet, P. J., Caley, M. J., Mengersen, K., Randin, C. F., Parnell, S., ... others.  
871 (2018). Outstanding challenges in the transferability of ecological models. *Trends in Ecology and*  
872 *Evolution*, *33*(10), 790–802.

873 **Tables**

Table 1: Regression coefficients (SE) in fitted resource-selection functions fit to data from Lupe the fisher. Models 1 and 3 use forest as the reference level, Model 2 uses wet as the reference level. Model 3 includes interactions between elevation and landcover classes.

|                         | Model 1            | Model 2            | Model 3            |
|-------------------------|--------------------|--------------------|--------------------|
| (Intercept)             | -13.168<br>(0.019) | -12.918<br>(0.107) | -13.171<br>(0.020) |
| elevation               | 0.303<br>(0.017)   | 0.303<br>(0.017)   | 0.313<br>(0.017)   |
| popden                  | -0.183<br>(0.021)  | -0.183<br>(0.021)  | -0.186<br>(0.021)  |
| landuseCgrass           | -1.477<br>(0.278)  |                    | -1.471<br>(0.278)  |
| landuseCwet             | 0.250<br>(0.108)   |                    | 0.183<br>(0.116)   |
| landuseC1forest         |                    | -0.250<br>(0.108)  |                    |
| landuseC1grass          |                    | -1.727<br>(0.297)  |                    |
| elevation:landuseCgrass |                    |                    | 0.112<br>(0.380)   |
| elevation:landuseCwet   |                    |                    | -0.498<br>(0.127)  |

## 874 Figures

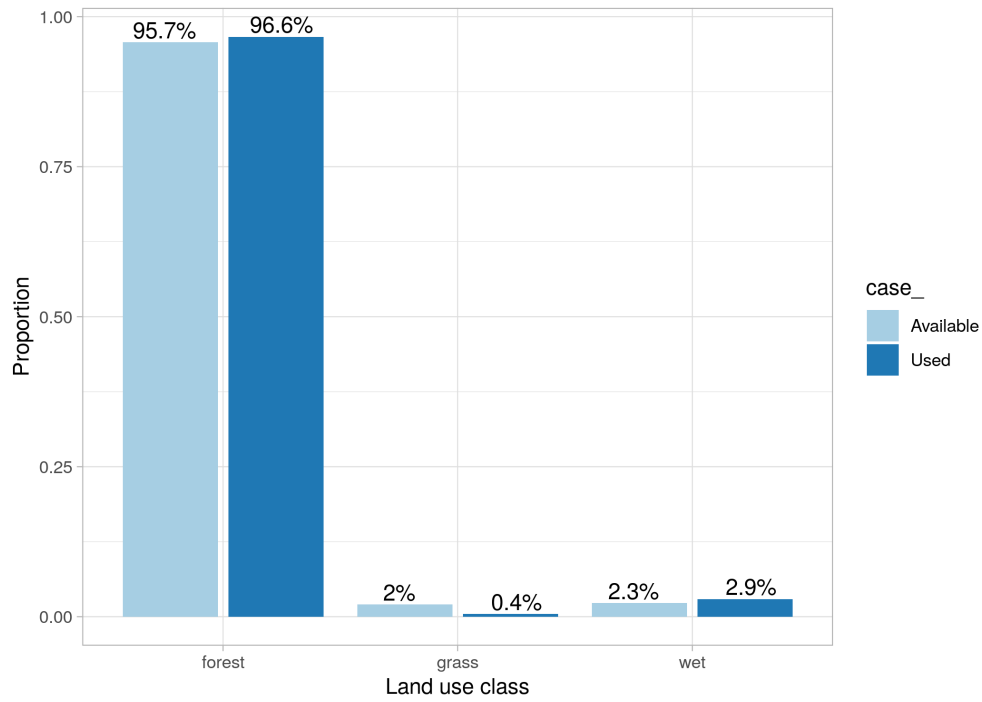

Figure 1: Distribution of used and available locations among different landscape cover classes for a fisher in upstate New York (LaPoint et al., 2013a, 2013b).

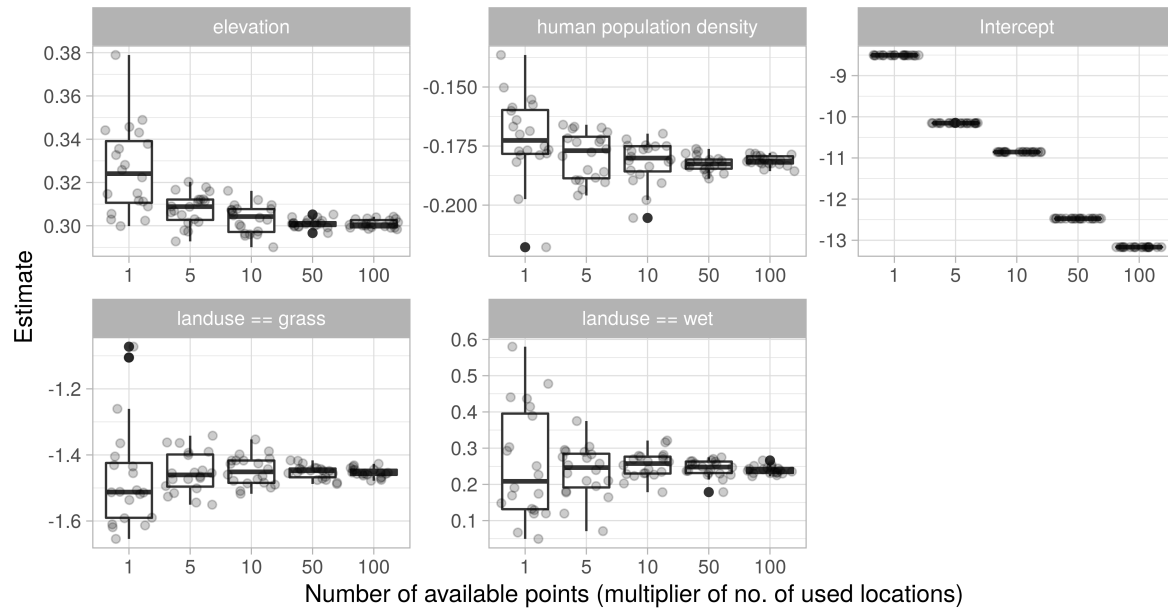

Figure 2: Estimated parameters in fitted resource-selection functions using increasing numbers of available points. Each dot represents an estimate from fitting a logistic regression model to 3004 GPS telemetry locations combined with a random sample of available points, with sample size given by the x-axis (where 1 means 3004 available points and 100 means 300,400 available points).

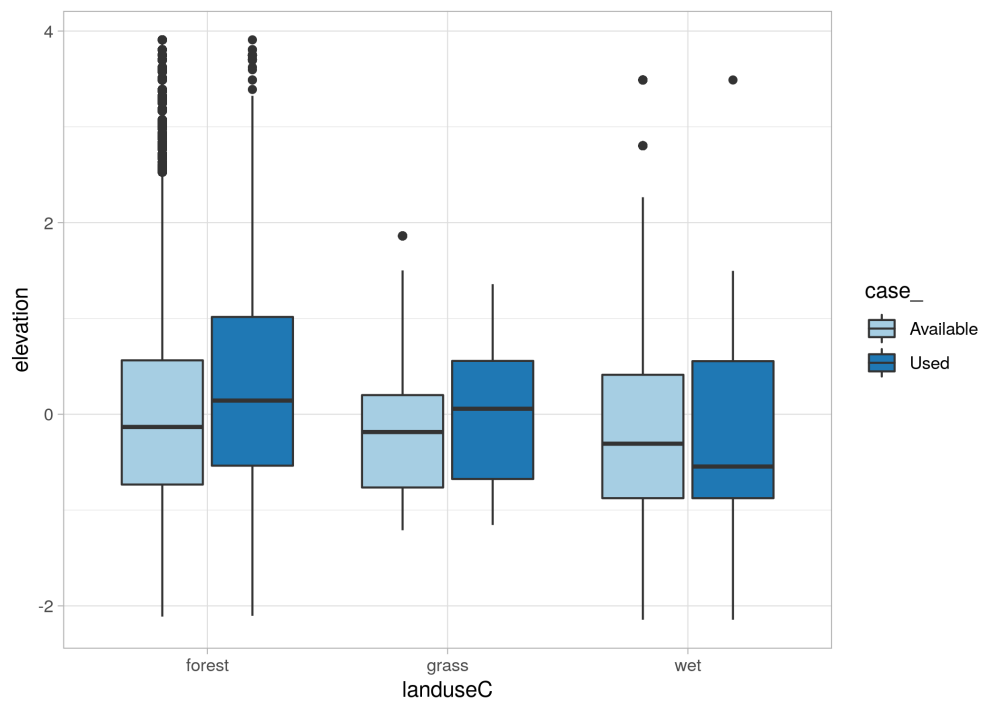

Figure 3: Distribution of elevation at used and available locations within each of 3 landcover types.

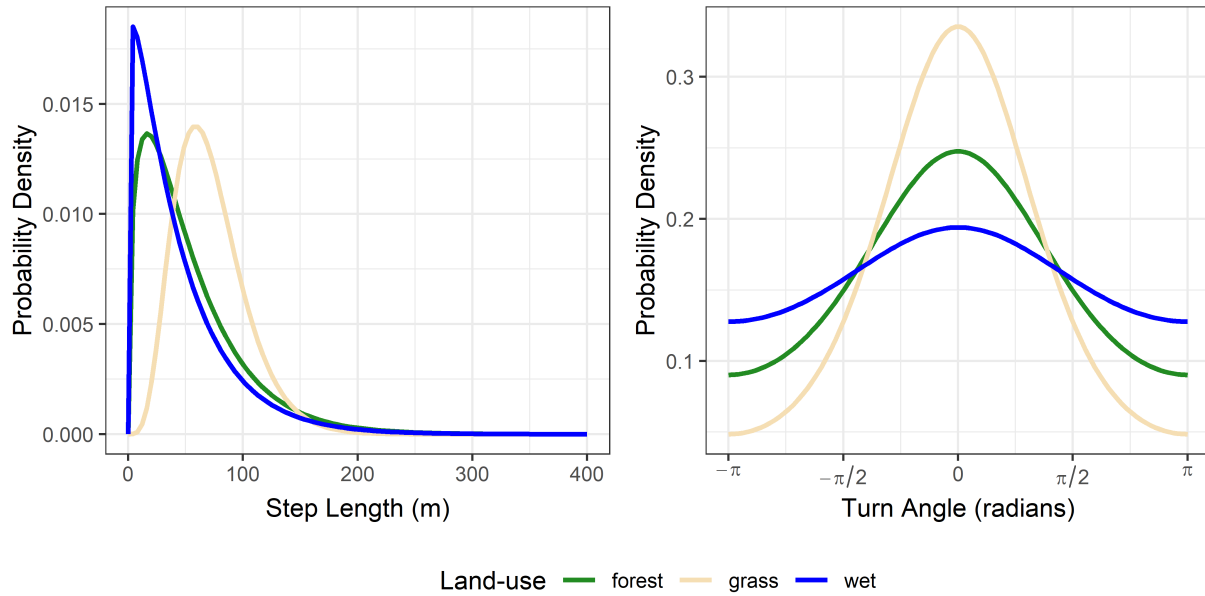

Figure 4: Step-length and turn-angle distributions from an integrated step-selection analysis applied to Lupe’s location data (see Supplementary Appendix B). The conditional logistic regression model included interactions between movement characteristics (step length, log step length, and cosine of the turn angle) and the landuse category Lupe was in at the start of the movement step. We see that Lupe tends to take larger, more directed steps when in **grass** and slower and more tortuous steps in **wet** habitat.



## 875 **Supporting Information**

876 **Supplementary Appendix A:** AppA\_RSF\_examples.html, a tutorial demonstrating how to fit  
877 and interpret parameters in resource-selection functions.

878 **Supplementary Appendix B:** AppB\_SSF\_examples.html, a tutorial demonstrating how to fit  
879 and interpret parameters and output when conducting an integrated step-selection analysis.

880 **Supplementary Appendix C:** AppC\_iSSA\_movement.html, a description of methods used to  
881 adjust ‘tentative’ parameters in step-length and turn-angle distributions for the effects of habitat  
882 selection.
