# A ‘How-to’ Guide for Interpreting Parameters in Habitat-Selection Analyses

John Fieberg, Johannes Signer, Brian Smith, Tal Avgar

## Affiliations

- JF: Department of Fisheries, Wildlife, and Conservation Biology, University of Minnesota, St. Paul, MN, 55112
- JS: Wildlife Science, Faculty of Forestry and Forest Ecology, University of Goettingen, Göttingen Germany
- BS, TA: Department of Wildland Resources and Ecology Center, Utah State University, Old Main Hill, Logan, UT 84322, USA

## Abstract

1. Habitat-selection analyses allow researchers to link animals to their environment via habitat-selection or step-selection functions, and are commonly used to address questions related to wildlife management and conservation efforts. Habitat-selection analyses that incorporate movement characteristics, referred to as *integrated step-selection analyses*, are particularly appealing because they allow modeling of both movement and habitat-selection processes.
2. Despite their popularity, many users struggle with interpreting parameters in habitat-selection and step-selection functions. Integrated step-selection analyses also require several additional steps to translate model parameters into a full-fledged movement model, and the mathematics supporting this approach can be challenging for many to understand.
3. Using simple examples, we demonstrate how weighted distribution theory and the inhom-

22        geneous Poisson point-process can facilitate parameter interpretation in habitat-selection  
23        analyses. Further, we provide a “how to” guide illustrating the steps required to implement  
24        integrated step-selection analyses using the `amt` package.

25        4. By providing clear examples with open-source code, we hope to make habitat-selection analyses  
26        more understandable and accessible to end users.

27        **Keywords:** habitat-selection function, inhomogeneous Poisson point-process, integrated step-  
28        selection analysis, intensity function, resource-selection function, relative selection strength, step-  
29        selection function, telemetry

## 30        **Introduction**

31        New technologies (e.g., improved Global Positioning System [GPS] collars) and advances in remote  
32        sensing have made it possible to collect animal location data on unprecedented spatial and temporal  
33        scales (Kays, Crofoot, Jetz, & Wikelski, 2015; Robinson et al., 2020), which in turn has fueled the  
34        development of new methods for modeling animal movement and for linking individuals to their  
35        environments (Guisan, Thuiller, & Zimmermann, 2017; Hooten, Johnson, McClintock, & Morales,  
36        2017). Two of the most popular approaches for analyzing telemetry data, *habitat-selection functions*  
37        (HSFs; Box 1) and *step-selection functions* (SSFs), compare environmental covariates at locations  
38        visited by an animal (“used locations”) to environmental covariates at a set of locations assumed  
39        available to the animal (“available locations”) using logistic and conditional logistic regression,  
40        respectively (Boyce & McDonald, 1999; Fortin et al., 2005; Thurfjell, Ciuti, & Boyce, 2014). These  
41        methods are widely available in most statistical software packages, and thus, they provide a robust and  
42        easy-to-implement framework for analyzing habitat-selection patterns. Note, here and throughout,  
43        we use the term *habitat-selection function* rather than the traditional *resource-selection function* to  
44        highlight our broader interest in modeling the effects of a diverse set of environmental variables  
45        (e.g., those capturing risks and environmental conditions in addition to resources). Habitat-selection  
46        functions are used to identify habitat features that are preferentially used or avoided by a species,  
47        and thus, to infer ecological needs and limitations, generate expected distribution maps, and inform  
48        demographic projections across space and time in support of species and landscape management  
49        (Boyce & McDonald, 1999; Matthiopoulos et al., 2015; Matthiopoulos, Field, & MacLeod, 2019).

50 Step-selection functions are further used to identify fine-scale behavioral interactions between animals  
51 and their biotic and abiotic environment (e.g., Dickie, McNay, Sutherland, Cody, & Avgar, 2020).  
52 Despite their popularity, our collective experience has been that many users struggle to interpret  
53 parameters in HSFs and SSFs. Further, it seems that papers attempting to address this issue have  
54 had limited success, and in some aspects may have increased confusion (see e.g., Keating & Cherry,  
55 2004; Johnson, Nielsen, Merrill, McDonald, & Boyce, 2006; Lele, Merrill, Keim, & Boyce, 2013;  
56 Avgar, Lele, Keim, & Boyce, 2017; Chamaillé-Jammes, 2019).

57 Here, we highlight how point-process models and weighted distribution theory provide simple and  
58 effective frameworks for interpreting regression parameters in habitat-selection and step-selection  
59 functions. In the sections that follow, we begin by reviewing recent research connecting habitat-  
60 selection functions to point-process models and weighted distribution theory. Using these connections,  
61 we demonstrate correct interpretation of parameters using simple examples of models fit to GPS  
62 locations of fisher (*Pekania pennanti*) from upstate New York (LaPoint et al., 2013a, 2013b). We  
63 then provide a short review of step-selection functions, including their history and methods for  
64 parameter estimation. Step-selection analyses (Box 2) are particularly appealing because: 1) they  
65 provide an objective method for defining habitat availability in terms of movement constraints;  
66 2) they relax the assumption that locations are statistically independent; and 3) by including  
67 movement characteristics (e.g., functions of step length and turn angle) as predictors, they provide a  
68 means to model both movement and habitat-selection processes (termed an *integrated step-selection*  
69 *analysis* by Avgar, Potts, Lewis, & Boyce, 2016). Recognizing that many may find the mathematics  
70 supporting integrated step-selection analyses intimidating, we aim to provide a “how to” guide  
71 demonstrating the steps required to implement the approach using the `amt` package (Signer, Fieberg,  
72 & Avgar, 2019). This demonstration is expanded upon using coded examples in the supplementary  
73 appendices, which we encourage the reader to explore. We end with a short discussion highlighting  
74 challenges related to statistical dependencies and model transferability.

## 75 Habitat-Selection Functions (HSFs)

### 76 Logistic Regression

77 Much of the confusion surrounding the interpretation of parameters in habitat-selection functions  
78 can be attributed to the use of logistic regression to model *use-availability* data (Keating & Cherry,  
79 2004). Logistic regression is most easily understood as a model for binary random variables that  
80 can take on one of two values (0 or 1) with probability that depends on one or more explanatory  
81 variables (Hosmer, Lemeshow, & Sturdivant, 2013).

82 Consider, for example, a study designed to infer how various environmental characteristics influence  
83 whether a habitat patch (e.g., a contiguous area of forest) will be used by one or more animals. In  
84 this case, we may randomly select  $n$  habitat patches and monitor them to determine if they are used  
85 ( $y_i = 1$ ) or not ( $y_i = 0$ ) for  $i = 1, 2, \dots, n$ . Logistic regression allows us to model the probability  
86 that each patch will be used,  $P(y_i = 1) = p_i$ , as a logit-linear function of  $k$  patch-level predictors  
87 ( $X_{i1}, \dots, X_{ik}$ ) and regression parameters ( $\beta_0, \beta_1, \dots, \beta_k$ ):

$$y_i \sim \text{Bernoulli}(p_i)$$
$$\text{logit}(p_i) = \log \left[ \frac{p_i}{(1 - p_i)} \right] = \beta_0 + \beta_1 X_{i1} + \dots + \beta_k X_{ik}$$

88 After having fit a model, we can exponentiate the regression coefficients,  $\exp(\beta_j)$  for ( $j = 1, \dots, k$ ),  
89 to quantify how the odds of patch  $i$  being used,  $p_i/(1 - p_i)$ , change as we increase the  $j^{\text{th}}$  predictor by  
90 1 unit while holding all other predictors constant. We can also use the inverse-logit transformation  
91 (eqn. (1)) to estimate the probability that patch  $i$  will be used, given its set of spatial predictors:

$$p_i = \frac{\exp(\beta_0 + \beta_1 X_{i1} + \dots + \beta_k X_{ik})}{1 + \exp(\beta_0 + X_{i1}\beta_1 + \dots + X_{ik}\beta_k)} \quad (1)$$

92 The logit transformation ensures that  $p_i$  will be constrained between 0 and 1 for all values of the  
93 predictor variables.

94 Contrast this approach with how logistic regression is used to study habitat selection. In a typical

95 habitat-selection

96 sample units, usually points; these groups are not mutually exclusive (i.e., available habitat may  
97 also be used). In this case,  $y_i$  is no longer a Bernoulli random variable since  $p_i$  depends on the ratio  
98 of used to available points (which is under control of the analyst). That is, the probability that a  
99 location will be a “used point” decreases with the number of user-generated “available” locations.  
100 Further, despite the fact that most analyses of telemetry data quantify environmental covariates in  
101 discrete space (i.e., pixels in a raster), the sampling itself is point-level and in continuous space.  
102 Thus, it is perhaps not surprising that there has been considerable confusion and controversy  
103 surrounding the use of logistic regression with use-availability data (e.g., Keating & Cherry, 2004;  
104 Johnson et al., 2006; Chamaille-Jammes, 2019).

105 Various arguments have been constructed to justify the use of logistic regression when analyzing  
106 use-availability data (Manly, McDonald, Thomas, McDonald, & Erickson, 2002; Johnson et al.,  
107 2006; Aarts, MacKenzie, McConnell, Fedak, & Matthiopoulos, 2008), but a significant breakthrough  
108 came when Warton & Shepherd (2010) made a connection between logistic-regression and a spatial  
109 inhomogeneous Poisson point-process (IPP). A spatial IPP is a model for random locations in space,  
110 where the expected spatial density of the locations depends on spatial predictors (see next section,  
111 **Inhomogeneous Poisson Point-process Model**). Warton & Shepherd (2010) showed that as the  
112 number of available points is increased towards infinity, the slope parameters in logistic regression  
113 models will converge to the slope parameters in an IPP model. Interestingly, several other popular  
114 approaches for analyzing species distribution data, including MaxEnt (Phillips & Dudík, 2008; Elith  
115 et al., 2011), weighted distribution theory with an exponential form (Lele & Keim, 2006), and  
116 resource utilization functions (Millspaugh et al., 2006), have been shown to be equivalent to fitting  
117 a spatial IPP model (Warton & Shepherd, 2010; Aarts, Fieberg, & Matthiopoulos, 2012; Fithian &  
118 Hastie, 2013; Hooten, Hanks, Johnson, & Alldredge, 2013; Renner et al., 2015).

119 Instead of focusing on  $p_i$ , as is typical in applications to presence-absence data, logistic regression  
120 applied to use-availability data should simply be viewed as a convenient tool for estimating coefficients  
121 in a *habitat-selection function*,  $w(X(s); \beta) = \exp(X_1(s)\beta_1 + \dots X_k(s)\beta_k)$  (Boyce & McDonald, 1999;  
122 Boyce, Vernier, Nielsen, & Schmiegelow, 2002), where we have written  $X(s)$  to highlight that  
123 the predictors correspond to measurements at specific point locations in geographic space,  $s$ . As

124 we will see in the next section, this expression is equivalent to the intensity function of an IPP  
125 model but with the intercept (the log of the baseline intensity) removed; the baseline intensity  
126 gives the expected density of points when all covariates are 0. Because habitat-selection functions  
127 do not include this baseline intensity, they are said to measure “relative probabilities of use”, or  
128 alternatively, said to be “proportional to the probability of use” (Manly et al., 2002). Although the  
129 term *probability of use* sounds appealing, probability in continuous space can only be assigned to  
130 areas, not points. Further, although probability of use is easily defined for discrete sample units  
131 (e.g. grid cells), these probabilities should increase with the size of the spatial unit and also with the  
132 study duration (Lele & Keim, 2006; Lele et al., 2013). Thus, with telemetry studies, it seems more  
133 natural to model spatial (or spatio-temporal) intensity functions or rates of use in continuous space  
134 (and time). Subsequently, “probabilities of use” can be determined by integrating these intensity  
135 functions over whatever spatial (and temporal) unit is deemed appropriate. Point-process models  
136 allow us to do just that.

### 137 **Inhomogeneous Poisson Point-Process (IPP) Model**

138 The IPP model provides a simple framework for modeling the density of points in space as a  
139 log-linear function of spatial predictors through a spatially-varying intensity function,  $\lambda(s)$ :

$$\log[\lambda(s)] = \beta_0 + X_1(s)\beta_1 + \dots X_k(s)\beta_k \quad (2)$$

140 where  $s$  is a location in geographic space, and  $X_1(s), \dots, X_k(s)$  are  $k$  spatial predictors associated  
141 with location  $s$ . The intercept,  $\beta_0$ , determines the log-density of points (within a small homogeneous  
142 area around  $s$ ) when all  $X_j(s)$  ( $j = 1, \dots, k$ ) are 0, and the slopes,  $\beta_1, \dots, \beta_k$ , describe the effect of  
143 spatial covariates on the log density of points in space. The IPP model can be understood by listing  
144 its key features and assumptions, namely:

- 145 1. The number of points in an area  $G$ ,  $y_G$ , is a Poisson random variable with mean  $E[y_G] =$   
146  $\int_G \lambda(s)ds$  (the spatial integral of  $\lambda(s)$  over  $G$ ).
- 147 2. Locations are independent (any clustering can be explained by spatial covariates).

148 If all available spatial predictors are measured only at a coarse scale (e.g., at a set of gridded or

149 rasterized cells), then fitting the IPP model is equivalent to fitting a Poisson regression model (Aarts  
 150 et al., 2012). Specifically, one may treat the counts,  $y_i$ , in  $n$  discrete spatial units ( $i = 1, \dots, n$ ),  
 151 as a set of independent Poisson random variables with means  $= \lambda(s_i)|G_i|$  where  $\lambda(s_i)$  is given by  
 152 eqn. (2) and  $|G_i|$  is the area of unit  $i$ . Note that  $\log[E(y_i)] = \log[\lambda(s_i)|G_i|] = \log[\lambda(s_i)] + \log(|G_i|)$ .  
 153 Thus, the log-link used in Poisson regression implies the area,  $|G_i|$ , should be included as an offset  
 154 (a predictor variable with regression coefficient fixed at a value of 1).

155 When spatial predictors are available at the point-level, as will be the case whenever constructing  
 156 “distance to” predictors (e.g., distance to nearest road, water source, etc), it will be advantageous to  
 157 model the locations in continuous space. In telemetry studies, the density of points will be determined  
 158 by the frequency and duration of data collection. Thus,  $\beta_0$  will not be of biological interest, and it  
 159 will be appropriate to focus efforts on estimating and interpreting the slope coefficients,  $\beta_1, \dots, \beta_k$ ,  
 160 which determine relationships between the spatial covariates and the relative density of locations  
 161 throughout the study area (Fithian & Hastie, 2013). As is the case with linear and generalized  
 162 linear models (e.g., Poisson regression), we can estimate parameters using maximum likelihood or  
 163 Bayesian methods. Both approaches require writing down an expression, called the *likelihood*, that  
 164 captures the data-generating mechanism in terms of one or more parameters. With telemetry data,  
 165 it makes sense to work with the conditional likelihood of the IPP model (Aarts et al., 2012), i.e., the  
 166 likelihood of the observed locations in space, conditional on there being  $y_G$  total observed locations.  
 167 The conditional likelihood is given by:

$$L(\beta_1, \dots, \beta_k | s_1, \dots, s_{y_G}) = \prod_{i=1}^{y_G} \frac{\lambda(s_i)}{\int_{s \in G} \lambda(s) ds} \quad (3)$$

168 where the product is over the  $y_G$  observed locations,  $\lambda(s_i)$  is the intensity function evaluated at  
 169 observation  $i$ , and the integral in the denominator evaluates the intensity function over the spatial  
 170 domain of interest (Cressie, 1992; Aarts et al., 2012). If we plug  $\lambda(s_i) = \exp(\beta_0 + X_1(s_i)\beta_1 +$   
 171  $\dots X_k(s_i)\beta_k)$  into eqn. (3),  $\beta_0$  will cancel from the numerator and denominator, leaving us with:

$$L(\beta; s_1, \dots, s_{y_G}) = \prod_{i=1}^{y_G} \frac{\exp(X_1(s_i)\beta_1 + \dots X_k(s_i)\beta_k)}{\int_{s \in G} \exp(X_1(s)\beta_1 + \dots X_k(s)\beta_k) ds} = \prod_{i=1}^{y_G} \frac{w(X(s_i); \beta)}{\int_{s \in G} w(X(s); \beta) ds} \quad (4)$$

172 where  $w(X(s); \beta) = \exp(\beta_1 X_1(s) + \dots + \beta_k X_k(s))$  is our habitat-selection function.

173 The binomial likelihood associated with logistic regression differs from eqn. (4), but Warton &  
174 Shepherd (2010) showed that logistic regression estimators of slope coefficients converge to the those  
175 of the IPP model as the number of available points increases toward infinity. Thus, the connection to  
176 the IPP model addresses a common question that arises when estimating habitat-selection functions,  
177 namely, “how many available points do I need?” The exact answer depends on how difficult it is to  
178 estimate the integral in the denominator of eqn. (4); the recommendation we offer is to increase the  
179 number of available points until the estimated slope coefficients no longer change much. Fithian &  
180 Hastie (2013) later showed that the convergence results of Warton & Shepherd (2010) hold only  
181 if the model is correctly specified, but assigning “infinite weights” to available points ensures the  
182 results hold more generally. Therefore, when fitting logistic regression or other binary response  
183 models (e.g., boosted regression trees) to use-availability data, we also suggest assigning a large  
184 weight (say 5000 or more) to each available location and a weight of 1 to all observed locations  
185 (larger weights can be used to verify that results are robust to this choice). For a coded example in  
186 R (R Core Team, 2019), see section **Interpreting Parameters in Habitat-Selection Functions**  
187 and Supplementary Appendix A.

## 188 **Weighted Distributions**

189 Weighted distribution theory provides another way to interpret parameters in habitat-selection  
190 functions (Lele & Keim, 2006; Johnson, Thomas, Ver Hoef, & Christ, 2008). Let:

- 191 •  $u(X)$  = the frequency distribution of habitat covariates,  $X$ , at locations used by our study  
192 animals.
- 193 •  $a(X)$  = the frequency distribution of habitat covariates,  $X$ , at locations assumed to be available  
194 to our study animals.

195 We can think of the *habitat-selection* function,  $w(X; \beta)$ , as providing a set of weights that takes us  
196 from the distribution of available habitat to the distribution of used habitat:

$$u(X) = \frac{w(X, \beta)a(X)}{\int_{Z \in E} w(Z, \beta)a(Z)dZ} \quad (5)$$



197 The denominator of eqn. (5) ensures that the right-hand side integrates to 1, and thus,  $u(X)$  is a  
198 proper probability distribution; the variable  $Z$  here is just a dummy variable used to allow integration  
199 over the frequency distribution of our environmental covariates. Because these distributions are  
200 written in terms of the habitat covariates,  $X$ , instead of geographical locations, we say that model  
201 is parameterized in *environmental space* ( $E$ ) (Hirzel & Le Lay, 2008; Elith & Leathwick, 2009;  
202 Matthiopoulos et al., 2020b).

203 To show that weighted distribution theory is consistent with the IPP formulation discussed above,  
204 we can rewrite eqn. (5) in *geographic space* ( $G$ ):

$$u(s) = \frac{w(X(s), \beta)a(s)}{\int_{g \in G} w(X(g), \beta)a(g)dg}, \quad (6)$$

205 where the denominator integrates over a geographic area,  $G$ , that is assumed to be available to  
206 the animal and  $g$  is a dummy variable for integration. Here  $u(s)$  is equivalent to the utilization  
207 distribution encountered in the literature on probabilistic estimators of animal home ranges (Van  
208 Winkle, 1975; Worton, 1989; Signer & Fieberg, 2020) and tells us how likely we are to find an  
209 individual at location  $s$  in geographic space. The utilization distribution,  $u(s)$ , depends on the  
210 environmental covariates associated with location  $s$ , through  $w(X(s); \beta)$ , and the distribution of  
211 available locations in geographic space,  $a(s)$ . When fitting HSFs,  $a(s)$  is typically assumed to  
212 be a uniform distribution within the geographical domain of availability,  $G$  (e.g., the individual's  
213 home range, the population's range, or the species range depending on the hierarchical level of  
214 habitat selection of interest; Johnson, 1980), with all areas within  $G$  assumed to be equally available  
215 to the organism. Hence,  $a(s)$  is typically a constant,  $1/|G|$ , that cancels from the numerator  
216 and denominator. Then, if we let  $w(X(s); \beta) = \exp(\beta_1 X_1(s) + \dots + \beta_k X_k(s))$ , we end up with the  
217 conditional likelihood of the IPP model (eqn. (4)) (Aarts et al., 2012). In summary, the IPP model  
218 and weighted distribution theory with an exponential form provide equivalent, suitable frameworks  
219 for interpreting parameters in logistic regression models fit to use-availability data.

## 220 Interpreting Parameters in Habitat-Selection Functions

221 To demonstrate how the IPP and weighted distribution theory frameworks help with interpreting  
222 parameters in fitted habitat-selection functions, we now consider a simple example using 3,004  
223 locations of a fisher named Lupe tracked as part of a larger telemetry study (LaPoint et al., 2013a,  
224 2013b). These data are publicly available and have been featured in a workshop highlighting  
225 Movebank's *Env-DATA* system for annotating locations with environmental covariates (Dodge et  
226 al., 2013; Fieberg et al., 2018). The location data were combined with available points sampled  
227 randomly from within a minimum convex polygon (MCP) formed using Lupe's locations. The used  
228 and available locations were then transformed to a projected coordinate reference system (NAD83 /  
229 Conus Albers) and annotated with environmental variables measuring human population density  
230 (Center for International Earth Science Information Network (CIESIN) Columbia University &  
231 CIAT, Centro Internacional de Agricultura Tropical, 2005), elevation (U. S. / Japan ASTER Science  
232 Team, 2009), and landcover class (Defourny et al., 2009). The original landcover data were grouped  
233 to form a variable named `landuseC` with the following categories: `forest`, `grass` and `wet` (Fig. 1).  
234 We created centered (mean = 0) and scaled (SD = 1) variables labeled `elevation` and `popden`  
235 from the original elevation and population density variables. We also created an indicator variable,  
236 `case_`, taking on a value of 1 for all used points and 0 for all available points (later, we discuss how  
237 to choose the number of available points).

238 For ease of interpretation, we will begin by assuming the effects of elevation, population density, and  
239 landcover class are additive and linear (on the log scale; eqn. (2)). Later, we will discuss how we can  
240 relax these assumptions using interactions to allow the effect of covariates to depend on the value  
241 of other habitat covariates and polynomials or splines to relax the assumption of linearity. We  
242 assign a weight of 5000 to the available locations and a weight of 1 to all observed locations (Fithian  
243 & Hastie, 2013). We can then fit a weighted logistic regression model using the `glm` function in R:

```
Lupe.dat$w <- ifelse(Lupe.dat$case_==1, 1, 5000)
```

```
HSF.Lupe <- glm(case_ ~ elevation + popden + landuseC,  
                data = Lupe.dat,  
                weight = w,
```

```
family = binomial)
```

244 Before interpreting the coefficients, it is important to make sure we have included a sufficient number  
245 of available points to allow parameter estimates to converge to stable values. To evaluate parameter  
246 stability, we fit logistic regression models to data sets with increasing numbers of available points  
247 (from 1 available point per used point to 100 available points per used point; see Supplementary  
248 Appendix A for the code). The intercept decreased as we increased the number of available points  
249 (as it is roughly proportional to the log difference between the numbers of used and available points),  
250 but the slope parameter estimates, on average, did not change much once we included at least 10  
251 available points per used point (Fig. 2). Further, as expected, estimates varied less from sample to  
252 sample as we increased the number of available points. Thus, we conclude that, in this particular  
253 case, having 10 available points per used point is sufficient for interpreting the slope coefficients.  
254 The only downside to including even more available points is that it may slow down computations,  
255 which is not an issue here. Increasing the number of available points also further reduces Monte  
256 Carlo error, so we proceed with the largest sample size we explored (100 available points per used  
257 point).

258 Let's consider the interpretation of the continuous covariates reflecting elevation and population  
259 density (Table 1, *Model 1*). Qualitatively, we might infer from the positive coefficient for `elevation`  
260 and negative coefficient for `popden` that, all other things being equal, Lupe is likely to select  
261 locations at higher elevations and in areas of lower population density. But, how do we interpret  
262 these coefficients quantitatively? Consider the following two locations, both in the same landcover  
263 class and with the same associated population density, but differing by 1 unit in `elevation` (since  
264 we have scaled this variable, a difference of 1 implies that the two observations differ by 1 SD in the  
265 original units of elevation):

- 266 • location  $s_1$ : `elevation = 3, popden=1.5, landuseC = wet`
- 267 • location  $s_2$ : `elevation = 2, popden=1.5, landuseC = wet`

268 Using eqn. (6), we can calculate Lupe's relative use of location 1 versus location 2:

$$\frac{u(s_1)}{u(s_2)} = \frac{\exp(3\beta_{elevation} + 1.5\beta_{pop\_den} + 0\beta_{grass} + 1\beta_{wet})a(s_1)}{\exp(2\beta_{elevation} + 1.5\beta_{pop\_den} + 0\beta_{grass} + 1\beta_{wet})a(s_2)} \quad (7)$$

269 where we have dropped the integral from eqn. (6) because it appears in both the numerator and  
270 denominator (and thus, cancels out). Now, if both locations are *equally available*, then  $a(s_1) = a(s_2)$ ,  
271 and we have:

$$\frac{u(s_1)}{u(s_2)} = \frac{\exp(3\beta_{elevation}) \exp(1.5\beta_{pop\_den} + \beta_{wet})}{\exp(2\beta_{elevation}) \exp(1.5\beta_{pop\_den} + \beta_{wet})} = \frac{\lambda(s_1)}{\lambda(s_2)} = \exp(\beta_{elevation}) = \exp(0.303) = 1.35 \quad (8)$$

272 Thus, we see that this ratio also provides an estimate of the relative intensity of use of the two  
273 locations (i.e.,  $\lambda(s_1)/\lambda(s_2)$ ), assuming the locations are equally available. In the context of habitat-  
274 selection analyses, Avgar et al. (2017) refer to  $\exp(\beta)$  as quantifying *relative selection strength*  
275 (RSS).

276 Note that we would arrive at the exact same expression if we chose *any* two locations that differed  
277 by 1 unit of **elevation** and had the same values for **popden** and **landuseC**. Thus,  $\exp(\beta_{elevation})$   
278 quantifies the relative intensity of use of two locations that differ by 1 SD unit of **elevation** but  
279 are otherwise equivalent (i.e., they are equally available and have the same values of all other  
280 habitat covariates). If Lupe were to be presented with two such hypothetical locations, the model  
281 suggests she would be 1.35 times more likely to choose the one with the higher elevation. A similar  
282 interpretation can be ascribed to **popden**. Given two observations that differ by 1 SD unit of **popden**  
283 but are otherwise equal, Lupe would be  $\exp(-0.183) = 0.833$  times as likely to choose the location  
284 with higher population density (or, equivalently,  $\exp(0.183) = 1.20$  times more likely to choose the  
285 location with the lower population density).

286 What about the coefficients for the landcover categories? Looking again at the regression output  
287 (Table 1, *Model 1*), we see that **grass** has a negative coefficient and **wet** has a positive coefficient.  
288 It is tempting to infer that Lupe spends most of her time in wet areas and rarely spends time in  
289 grassy habitats. As Figure 1 makes it clear, however, these inferences are not exactly correct. First,  
290 it is important to understand how categorical predictors are encoded in regression models. There

291 are a number of different ways to parameterize the effect of categorical variables and unfamiliar  
292 readers may want to work through an introductory regression text (e.g., Chapter 6 of Kéry, 2010).  
293 The default coding in R is to treat one of the levels (whichever comes first alphanumerically) as a  
294 reference level and then to create a set of dummy variables that contrast the remaining levels of  
295 the categorical variable with this reference level. In our case, **forest** is the reference level. The  
296 coefficients associated with **grass** and **wet** represent contrasts between these land cover classes and  
297 the **forest** class. Qualitatively, we can use the signs and absolute magnitude of the coefficients  
298 for **grass** and **wet** to rank the landcover classes in terms of their relative selection strength, with  
299 **grass** < **forest** < **wet**. But again, how should we interpret the coefficients for **grass** and **wet**  
300 quantitatively?

301 Let's again consider 2 locations, this time assuming they have the same elevation and population  
302 densities, but with one location in **wet** and the other location in **forest**:

- 303 • location  $s_1$ : **elevation** = 2, **popden**=1.5, **landuseC** = **wet**
- 304 • location  $s_2$ : **elevation** = 2, **popden**=1.5, **landuseC** = **forest**

305 Lupe's relative use of location 1 relative to location 2 is given by (eqn. (6)):

$$\frac{u(s_1)}{u(s_2)} = \frac{\exp(2\beta_{elevation} + 1.5\beta_{pop\_den} + 0\beta_{grass} + 1\beta_{wet})a(s_1)}{\exp(2\beta_{elevation} + 1.5\beta_{pop\_den} + 0\beta_{grass} + 0\beta_{wet})a(s_2)} = \exp(\beta_{wet}) \frac{a(s_1)}{a(s_2)} \quad (9)$$

306 Thus, *assuming the two locations are equally available*, we might infer that Lupe would be  
307  $\exp(0.250) = 1.28$  times more likely to choose the **wet** location than the location in **forest**.  
308 Of course, we know from Figure 1 that **forest** and **wet** are not equally available on the landscape.  
309 The higher availability of **forest** habitat implies that Lupe is more likely to be in **forest** than **wet**.  
310 We could attempt to correct for differences in availability within the MCP surrounding Lupe's loca-  
311 tions by multiplying our result by the ratio of habitat availability for **wet** relative to **forest** habitats  
312 (2.3% versus 95.7%; Fig. 1). This gives us an adjusted ratio equal to  $\exp(0.250)(0.023)/(0.957) =$   
313  $0.03$ , suggesting we are  $(1/0.03) = 33$  times more likely to find Lupe in **forest** than **wet** habitat.  
314 With this calculation, we had to assume, perhaps naively, that the availability distributions for  
315 **popden** and **elevation** were the same in both **wet** and **forest** cover classes. In reality, if Lupe  
316 decides to move from **forest** to **wet**, it is likely that she will experience a change in **elevation** and

317 **popden** too (i.e., these factors will not be held constant). To quantify Lupe’s relative use of **forest**  
318 versus **wet** habitat, while also accounting for the effects other environmental characteristics that are  
319 associated with these habitat types, we can use integrated intensities – i.e., we can integrate the  
320 spatial utilization distribution,  $u(s)$ , over all **forest** and **wet** habitats:

$$\frac{u(s, s \in \text{forest})}{u(s, s \in \text{wet})} = \frac{\int_G u(s)I(s \in \text{forest})ds}{\int_G u(s)I(s \in \text{wet})ds} \quad (10)$$

321 where  $I(s \in \text{forest})$  and  $I(s \in \text{wet})$  are indicator functions equal to 1 when location  $s$  is in **forest**  
322 or **wet**, respectively (and 0 otherwise). We can estimate this ratio using estimated HSF values,  
323  $\hat{w}(X(s_i); \hat{\beta})$ , at our set of  $n_a$  available points drawn from within  $G$ . Specifically, we sum the HSF  
324 values at all available points that fall in **forest** and then divide by the sum of HSF values for all  
325 available points falling in **wet**:

$$\frac{\hat{u}(s, s \in \text{forest})}{\hat{u}(s, s \in \text{wet})} = \frac{\sum_{i=1}^{n_a} \hat{w}(X(s_i); \hat{\beta})I(s_i \in \text{forest})}{\sum_{i=1}^{n_a} \hat{w}(X(s_i); \hat{\beta})I(s_i \in \text{wet})}, \quad (11)$$

326 This ratio is also equal to 33, which agrees with the observed data; Lupe was found in **forest** habitat  
327 33 times more often than in **wet** habitat (see Supplementary Appendix A for code demonstrating  
328 how to calculate these quantities in R). Thus, we conclude Lupe is 33 times more likely to be  
329 found in **forest** than **wet** habitat (despite preferring **wet** over **forest**), assuming she restricts her  
330 movements to the MCP surrounding her observed locations and all of this MCP is equally available  
331 to her.

332 Before moving on, it is important to note that naively-adjusted ratios (multiplying by availability of  
333 **wet** and **forest** habitats) and integrated-intensities will not always agree. In fact, we find that they  
334 differ when comparing Lupe’s relative use of **wet** versus **grass** habitat, with the integrated-intensity  
335 better agreeing with the observed data (see Supplementary Appendix A). Somewhat related, Avgar  
336 et al. (2017) suggested calculating *average effects* for continuous predictors,  $X$ , by comparing the  
337 change in relative intensities from increasing  $X$  by 1 unit (to  $X = x + 1$ ) to the average value  
338 of  $w(X(s); \beta)$  for all locations  $s$  with  $X(s) = x$ . These average effects will also be influenced by  
339 cross-correlations among predictor variables included in the model.

340 Instead of integrating  $u(s)$  over discrete cover types, we could integrate over specific geographic  
341 areas. For example, we could use integrated intensities to compare two areas in space, replacing the  
342 “landcover class” indicator variables,  $I(s_i \in forest)$  and  $I(s_i \in wet)$  in eqn. (11), with indicator  
343 variables for whether available locations fall in particular spatial regions. In addition, we could  
344 choose to change the area of interest (and thus, area of integration) from  $G$  to  $\tilde{G}$ , and then use  
345 the fitted model and eqn. (6) to project how Lupe would spend her time in a novel environment  
346 (referred to as an “out-of-sample” prediction). Despite the common reliance on HSFs as predictive  
347 models, out-of-sample predictions often suffer from poor accuracy, especially when compared to “in  
348 sample” predictions, i.e., predictions for the same area and time frame from which the original data  
349 were collected (Torres et al., 2015; Yates et al., 2018). We return to this important point in the  
350 discussion section.

351 Let’s next consider what happens if we change the reference level of the land cover variable from  
352 **forest** to **wet** (Table 1, *Model 2*).

```
Lupe.dat <- within(Lupe.dat,  
                   landuseC1 <- relevel(landuseC, ref = "wet"))  
HSF.Lupe2 <- glm(case_ ~ elevation + popden + landuseC1,  
                 data = Lupe.dat,  
                 weight = w,  
                 family = binomial)
```

353 The coefficients for **elevation** and **popden** do not change. Note, however, that the coefficient for  
354 **forest** is negative despite Lupe using **forest** more than its availability (i.e.,  $u(s, s \in forest) >$   
355  $a(s, s \in forest)$ ) and Lupe spending more than 95% of her time in the forest! What is going on?  
356 Remember, the coefficients for categorical predictors reflect use:availability ratios for each level of  
357 the predictor relative to the use:availability ratio for the reference class. The coefficient for **forest**  
358 is negative because the use:availability ratio for **forest** is less than the use:availability ratio for  
359 the reference class, **wet** (see Fig. 1). Depending on the reference level, it is possible to have a  
360 positive (negative) coefficient even when that landcover class is used more (less) than its availability.  
361 Furthermore, it is possible for a landcover class to be used frequently but have a negative coefficient.

362 We have seen many ecologists, including some that are very quantitatively skilled and familiar with  
363 habitat-selection models, make mistakes when interpreting coefficients associated with categorical  
364 predictors. This example also highlights the importance of plotting your data (e.g., Fig. 1) and  
365 considering habitat availability when interpreting regression coefficients. Plotting distributions  
366 of covariates for both used and available locations is one of the best ways to understand fitted  
367 habitat-selection models, and is a good strategy to use for both continuous and categorical predictors  
368 (Merow, Smith, & Silander, 2013; Fieberg, Forester, et al., 2018).

### 369 Interactions Between Environmental Predictors

370 Consider the distribution of `elevation` at used and available locations across the different habitat  
371 classes (Fig. 3). We see that there is a wider range of `elevation` in `forest` and `wet` habitat  
372 compared to `grass` habitat, and there is a clear association between `elevation` and `landuseC`, with  
373 higher median `elevation` at used locations in `forest` and `grass` habitat relative to `wet` habitat.  
374 Perhaps more importantly, we also see that values of `elevation` are higher, on average, for used  
375 locations (compared to available locations) in `forest` and `grass`, whereas the opposite is true in  
376 `wet` habitat. Although we should be skeptical of interactions that we discover while exploring our  
377 data (i.e., interactions that were not specified *a priori*), an analyst may be tempted to include an  
378 interaction between `elevation` and `landuseC`. In *Model 3* (Table 1), we revert to having `forest`  
379 as the reference level and include the interaction between `elevation` and `landuseC`.

```
Lupe.dat <- within(Lupe.dat , landuseC <- relevel(landuseC, ref = "forest"))  
HSF.Lupe3 <- glm(case_ ~ elevation + popden + landuseC + elevation:landuseC,  
                 data = Lupe.dat,  
                 weight = w,  
                 family = binomial)
```

380 Using this syntax, R creates two new variables `elevation:landuseCgrass` equal to `elevation`  
381 when `landuseC` is `grass` and is 0 otherwise, and `elevation:landuseCwet` equal to `elevation`  
382 when `landuseC` is `wet` and is 0 otherwise. The coefficients associated with these predictors quantify  
383 the change in slope (i.e., change in the effect of `elevation`) when the locations fall in `grass` or  
384 `wet`, relative to the slope when the locations fall in `forest`. Starting from eqn. (6) and using the



385 estimates for *Model 3* in Table 1, we can easily derive that the relative intensity of use of two  
386 equally available locations that differ by 1 SD unit of `elevation` is equal to  $\exp(0.313) = 1.37$  when  
387 the two locations are in `forest`,  $\exp(0.313 + 0.112) = 1.53$  when the locations are in `grass`, and  
388  $\exp(0.313 - 0.499) = 0.83$  when the locations are in `wet` habitat. Thus, we might conclude that Lupe  
389 would select for higher elevations when in `forest` or `grass`, but avoid higher elevations when in  
390 `wet`. Alternatively, we can consider how `elevation` changes Lupe’s view of the different landcover  
391 categories, noting that  $\beta_{grass} = -1.471 + 0.112\text{elevation}$  and  $\beta_{wet} = 0.183 - 0.499\text{elevation}$ .  
392 Thus, we see that Lupe’s relative avoidance of `grass` (relative to `forest`) and selection for `wet`  
393 (relative to `forest`) both decline with `elevation`, and Lupe’s inherent ranking of these 3 habitat  
394 types will change as `elevation` increases. Both interpretations are statistically correct; the analyst  
395 chooses which one to use based on the ecological motivations for the analysis (the narrative sensu  
396 Otto & Rosales, 2020).

## 397 **Non-Linear Effects and Other Considerations**

398 When building models, it is important to consider the functional relationships between different  
399 environmental characteristics and habitat use. For example, we may classify available predictors  
400 based on whether they represent resources (higher values are generally preferable), risks (lower  
401 values are generally preferable), or conditions (values that are not too high or too low are preferable)  
402 (e.g., Matthiopoulos et al., 2015, 2020a). It is often useful to allow for non-linear effects of conditions  
403 by including quadratic terms or using a set of spline basis functions. In either case, we end up  
404 requiring multiple coefficients to capture how the intensity of use changes with the environmental  
405 predictor. Consider, for example, that we could include a quadratic term to model the effect of  
406 `elevation`, with the expectation of a unimodal habitat-selection function with respect to `elevation`.  
407 Estimating the relative use of locations  $s_1$  and  $s_2$  that differ in their values of `elevation` but are  
408 otherwise equivalent would be straightforward using eqn. (6) - we would just need to calculate the  
409 ratio of relative intensities using coefficients for `elevation` and `elevation`<sup>2</sup>:

$$\frac{u(s_1)}{u(s_2)} = \frac{\exp(\text{elevation}(s_1)\beta_{\text{elevation}} + \text{elevation}(s_1)^2\beta_{\text{elevation}^2})}{\exp(\text{elevation}(s_2)\beta_{\text{elevation}} + \text{elevation}(s_2)^2\beta_{\text{elevation}^2})} \quad (12)$$

410 Avgar et al. (2017) provide simple formulas for calculating relative intensities under a number of  
411 different scenarios (e.g., models with quadratic polynomials, log-transformed covariates, and models  
412 with interactions). The `log_rss` function in the `amt` package (Signer et al., 2019) relies on R's  
413 generic `predict` function to aid the user in calculating the log relative intensity for any combination  
414 of model structure and two alternative locations; its use is illustrated in Supplementary Appendix  
415 B. Understanding how these formulas are derived, however, helps build intuition and frees the user  
416 to construct estimators and estimation targets that capture relevant quantities of specific interest.

## 417 **Statistical Independence**

418 An important assumption of the IPP model, and hence, habitat-selection functions fitted to use-  
419 availability data via logistic regression, is that any clustering of spatial locations can be explained  
420 solely by spatial covariates. Strictly speaking, this assumption will almost never be met, particularly  
421 with modern-day telemetry studies that allow several locations to be collected on the same day.  
422 Telemetry observations close in time tend to also be close in space – i.e., telemetry observations  
423 exhibit serial dependence (Fleming et al., 2014). This serial dependence is likely to manifest  
424 itself in residual spatial autocorrelation that could be modeled using a spatial random effect or  
425 a spatial predictor constructed to account for the effects of movement constraints on habitat  
426 availability (Johnson, Hooten, & Kuhn, 2013). Models with spatial random effects are, however,  
427 more complicated and difficult to fit.

428 Alternatively, if telemetry observations are collected at regular time intervals, then the locations  
429 may be argued to provide a representative sample of habitat use from a specific observation window  
430 (Otis & White, 1999; Fieberg, 2007). In these cases, it may be helpful to view our estimates of  
431 the parameters in our habitat-selection function,  $\hat{\beta}$ , as useful summaries of habitat use for tagged  
432 individuals during these fixed time periods. Nevertheless, the assumption of independence of our  
433 locations is clearly problematic and will lead to estimates of uncertainty that are on average too  
434 small. If we are primarily interested in population-level inferences, then we may choose to ignore  
435 within-individual autocorrelation when estimating individual-specific coefficients but use a robust  
436 form of SE that treats individuals as independent when describing uncertainty in population-level  
437 parameters (e.g., using a bootstrap; Fieberg, Vitense, & Johnson, 2020) or generalized estimating

438 equations approach (e.g., Fieberg, Rieger, Zicus, & Schildcrout, 2009; Koper & Manseau, 2009;  
439 Fieberg, Matthiopoulos, Hebblewhite, Boyce, & Frair, 2010).

## 440 Step-Selection Functions

441 Step-selection functions were developed to deal with serial dependence as well as temporally varying  
442 availability distributions resulting from movement constraints (Fortin et al., 2005; Thurfjell et al.,  
443 2014). Rather than treat locations as independent and identically distributed (with availability  
444 that does not depend on time), step-selection functions model transitions, or “steps”, connecting  
445 sequential locations ( $\Delta t$  units apart) in geographical space. The resulting redistribution kernel takes  
446 the general form:

$$u(s, t + \Delta t) | u(s', t) = \frac{w(X(s); \beta(\Delta t)) \phi(s, s'; \gamma(\Delta t))}{\int_{\tilde{s} \in G} w(X(\tilde{s}, s'); \beta(\Delta t)) \phi(\tilde{s}, s'; \gamma(\Delta t)) d\tilde{s}} \quad (13)$$

447 where  $u(s, t + \Delta t) | u(s', t)$  gives the conditional probability of finding the individual at location  $s$  at  
448 time  $t + \Delta t$  given it was at location  $s'$  at time  $t$ ,  $w(X(s); \beta(\Delta t))$  is referred to as a step-selection  
449 function, and  $\phi(s, s'; \gamma(\Delta t))$  is a selection-free movement kernel that describes how the animal would  
450 move in homogeneous habitat or in the absence of habitat selection (i.e., when  $w(X(s); \beta(\Delta t)) = a$   
451 constant for all  $s$ ). Note that we represent the parameter vectors ( $\beta$  and  $\gamma$ ) as functions of the step  
452 duration ( $\Delta t$ ). This notation reflects the fact that step-selection parameters are scale dependent  
453 (i.e., different  $\Delta t$ 's will result in different estimates of  $\beta$  and  $\gamma$ ; see Avgar et al., 2016 for more  
454 details). Thus, we generally require observations to be equally spaced in time (but see Munden  
455 et al., 2020), and care must be taken when comparing inference from models fitted at different  
456 temporal resolution. When animals are observed at irregular time intervals, as with many marine  
457 species, it is possible to first fit a continuous-time movement model to the location data and then  
458 use this model to provide multiply imputed data sets that are regularly spaced in time (see e.g.,  
459 McClintock, 2017).

460 As with habitat-selection functions, it is typical to model  $w(X(s); \beta(\Delta t))$  as a log-linear function  
461 of spatial covariates and regression parameters,  $w(X(s); \beta(\Delta t)) = \exp(X_1(s)\beta_1 + \dots X_k(s)\beta_k)$ . A  
462 key difference between habitat-selection functions and step-selection functions, however, is that

463 the latter allow the available distribution to be time-dependent and equal to  $a(s, t + \Delta t) =$   
464  $\phi(s, s', \gamma(\Delta t))$ . Consequently, step-selection functions allow explicit consideration of temporally  
465 dynamic environmental covariates,  $X(s', t)$  and  $X(s, t + \Delta t)$  (and, possibly, environmental covariates  
466 measured along the path between these two locations). One option that often performs well and  
467 enhances interpretability is to include habitat covariates at the start of the movement step in  
468 the model for  $\phi$ , and habitat covariates at the end of the movement step in the model for  $w$ ;  
469 we provide an example in Supplementary Appendix B. This approach allows us to separately  
470 model the effect of habitat on accessibility (through the model for  $\phi$ ) and selection (through  
471 the model for  $w$ ) (Matthiopoulos, 2003), and results in a more general formulation:  $w(X(s, t +$   
472  $\Delta t); \beta(\Delta t))\phi(s, s'; \gamma(\Delta t, X(s', t)))$ . We recognize, however, that there may be covariates, often  
473 measured along a movement path (e.g., crossing of a road or passing over an extremely steep slope),  
474 that also influence accessibility but that may be best included in the model for  $w$ . In general,  
475 we recommend including covariates in the model for  $\phi$  when they are likely to influence general  
476 movement characteristics and in the model for  $w$  when they are likely to influence the overall  
477 attractiveness of a more limited region of geographic space.

#### 478 **Models for $\phi(s, s'; \gamma(\Delta t))$**

479 Step-selection functions build on an early idea by Arthur, Manly, McDonald, & Garner (1996) to  
480 model time-dependent availability via a circular buffer with radius  $R$  centered on the previous  
481 location. Rhodes, McAlpine, Lunney, & Possingham (2015) showed that this model is equivalent to  
482 assuming:

$$\phi(s, s'; \gamma(\Delta t)) = \begin{cases} \frac{1}{\pi R^2}, & \text{if } \|s - s'\| \leq R \\ 0, & \text{otherwise} \end{cases} \quad (14)$$

483 where  $\|s - s'\|$  is the Euclidean distance between locations  $s$  and  $s'$ , referred to as the *step length*.  
484 Rhodes et al. (2015) also demonstrated that circular buffers imply that individuals are more  
485 likely to move large distances than short distances since there is more area, and thus probability,  
486 associated with outer rings of the circle. Instead, they suggested using an exponential distribution  
487 to accommodate right-skewed step-length distributions and a tendency for animals to make shorter

488 rather than longer movements:

$$\phi(s, s'; \gamma(\Delta t)) = \frac{\lambda \exp(-\lambda \|s - s'\|)}{2\pi \|s - s'\|} \quad (15)$$

489 Rather than specify a model directly in terms of  $\phi(s, s'; \gamma(\Delta t))$ , it is more common to see movement  
490 kernels specified in terms of the distribution of step lengths,  $d = \|s - s'\|$ , and turn angles (changes  
491 in direction from the previous bearing),  $\theta$ . In the sections that follow, we will let  $g(d; \gamma_d(\Delta t))$   
492 and  $f(\theta; \gamma_\theta(\Delta t))$  represent step-length and turn-angle distributions, respectively. Step-selection  
493 analyses frequently use either an exponential or gamma distribution for  $g(d; \gamma_d(\Delta t))$ . Turn angles  
494 may be assumed to be uniformly distributed as in Arthur et al. (1996) and Rhodes et al. (2015).  
495 Alternatively, circular distributions, such as the von Mises distribution or wrapped Cauchy or  
496 Weibull distributions, allow for a mode at 0 and can thus accommodate correlated movements (i.e.,  
497 sequential steps are assumed, on average, to follow in the same direction as the previous step).

498 Although step-length and turn-angle distributions are typically assumed to be independent, animals  
499 commonly exhibit a mix of temporally persistent movement behaviors, ranging between high-  
500 displacement movements (e.g., when traveling between habitat patches, migrating, or dispersing)  
501 and low-displacement movements (e.g., during foraging or resting bouts). If positional data are  
502 collected more frequently than the occurrence of behavioral switches, we might expect a negative cross-  
503 correlation between step lengths and turn angles (moving far is likely to coincide with moving straight)  
504 and a positive auto-correlation between the current and previous step lengths and turn angles.  
505 Moreover, as implied by the more flexible formulation,  $w(X(s, t + \Delta T); \beta(\Delta t))\phi(s, s'; \gamma(\Delta t, X(s', t)))$ ,  
506 both step-length and turn-angle distribution may shift as a function of spatial and/or temporal  
507 covariates such as habitat permeability (e.g., terrain ruggedness, snow depth, or vegetation density),  
508 time of day, season, and predation risk (Avgar, Mosser, Brown, & Fryxell, 2013; Avgar et al., 2016).  
509 Thus, although  $\phi$  is a “selection-free” movement kernel, it may still depend on environmental or  
510 temporal covariates, and hence, may vary through space and time, resulting in both auto- and  
511 cross-correlations in step attributes.

512 Cross-correlation between step lengths and turn angles is difficult to model with common statistical  
513 distributions, but could be accommodated using copulae (Durante & Sempi, 2010). Alternatively,

514 one could resample (i.e., bootstrap) step length and turn angle pairs,  $(d_t, \theta_t)$ , to preserve any  
515 correlation that is present in the data (Fortin et al., 2005). Although we generally find the bootstrap  
516 appealing (Fieberg et al., 2020), it has limitations in this context. In particular, the observed  
517 distribution of step lengths and turn angles will reflect both inherent movement characteristics of  
518 the species (captured by  $\phi$ ) as well as habitat selection (captured by  $w$ ). Using the observed steps as  
519 a non-parametric model for  $\phi$  without adjustment for the effect of  $w$  can result in biased estimates  
520 of  $\beta$  (Forester, Im, & Rathouz, 2009). We will return to this point in the next section. As mentioned  
521 previously (see **Statistical Independence**), and regardless of the source of correlation, it may  
522 be preferable to calculate robust SEs by treating individuals as the relevant sampling unit when  
523 performing population-level inference (e.g., Prima, Duchesne, & Fortin, 2017). Lastly, cross- and  
524 auto-correlations in step lengths and turn angles, as well as their dependencies on various temporal  
525 or environmental characteristics, could be modeled parametrically using an integrated step-selection  
526 function (Avgar et al., 2016). To do so, we need to include appropriate statistical interactions (e.g.,  
527 between concurrent and previous step lengths/turn angles and between these step-attributes and  
528 environmental or temporal covariates). We discuss this process further below, and provide examples  
529 in the Supplementary Appendix B. See also Prokopenko, Boyce, & Avgar (2017), Scrafford, Avgar,  
530 Heeres, & Boyce (2018), and Dickie et al. (2020).

## 531 **Estimation of Movement and Habitat-Selection Parameters**

532 Although it is possible to simultaneously estimate movement ( $\gamma$ ) and habitat-selection ( $\beta$ ) parameters  
533 using maximum likelihood (e.g., Rhodes et al., 2015) or Bayesian methods (e.g., Johnson et al.,  
534 2008), this is rarely done in practice as it would require custom-written code. Instead, it is common  
535 to use the following approach:

- 536 1. Estimate or approximate  $\phi(s, s'; \gamma(\Delta t))$  using observed step lengths and turn angles, giving  
537  $\hat{\phi}(s, s'; \hat{\gamma}(\Delta t))$ .
- 538 2. Generate time-dependent available locations by simulating potential movements from the  
539 previously observed location,  $u(t, s')$ . Similar to applications of HSFs, it is up to the user to  
540 decide how many available locations to sample for each used location, and, due to similar  
541 considerations (properly approximating the availability domain:  $a(s, t + \Delta t) = \phi(s, s'; \gamma(\Delta t))$ ,

542 the more points the merrier.

543 3. Estimate  $\beta$  using conditional logistic regression, with strata formed by combining time-  
544 dependent used and available locations.

545 If we knew  $\phi(s, s', \gamma(\Delta t))$  and could simulate directly from it (skipping step 1), then this approach  
546 would provide unbiased estimates of  $\beta$  (Forester et al., 2009). However, as mentioned in the previous  
547 section, estimating the selection-free movement kernel,  $\phi(s, s'; \gamma(\Delta t))$ , from observed steps without  
548 adjusting for habitat selection, via  $w(X(s); \beta(\Delta t))$ , can lead to biased estimates of  $\gamma$  and  $\beta$ .

549 Forester et al. (2009) considered the case where the step-length distribution,  $g(d, \gamma_d)$ , is given by  
550 an exponential distribution with unknown parameter,  $\lambda$ . They showed that estimating  $\lambda$  directly  
551 from the observed distribution of step lengths (without adjusting for the effect of  $w(X(s); \beta(\Delta t))$ ),  
552 and then proceeding with steps 2 and 3 results in a biased estimators of  $\beta$ . Forester et al. (2009)  
553 also showed that the bias (if  $g(d, \gamma_d)$  is given by an exponential distribution) is eliminated if  $\log(d_t)$   
554 is included as a predictor in the model. Avgar et al. (2016) further showed that the coefficient  
555 associated with  $\log(d_t)$  could be used to modify  $\hat{\lambda}$ , leading to an unbiased estimator of  $\lambda$  and  
556 thus,  $g(d, \gamma_d)$ . In addition, they showed how similar adjustments could be used to obtain unbiased  
557 estimators of step-length ( $\gamma_d$ ) and habitat-selection ( $\beta$ ) parameters when the distribution of step  
558 lengths is given by a gamma, half-normal, or log-normal distribution. Similarly, Duchesne, Fortin,  
559 & Rivest (2015) showed that including  $\cos(\theta)$  as a predictor can lead to unbiased estimators of turn  
560 angle parameters ( $\gamma_\theta$ ) when the distribution of turn angles follows a von Mises distribution. All of  
561 these adjustments are available in the `amt` package (Signer et al., 2019). Avgar et al. (2016) coined  
562 the term *integrated* step-selection analysis to emphasize that these results provide new opportunities  
563 to model both movement and habitat selection via tried and true statistical software for fitting  
564 conditional logistic regression models.

565 In Supplementary Appendix B, we provide a “How to” guide for implementing an integrated step-  
566 selection analysis using the `amt` package in R (R Core Team, 2019; Signer et al., 2019). Conducting  
567 an integrated step-selection analysis requires, in addition to the 3 steps outlined in this section,  
568 that we add a fourth step that re-estimates the movement parameters in  $\phi(s, s'; \gamma(\Delta t))$  using  
569 regression coefficients associated with movement characteristics (e.g.,  $\log(d_t)$ ,  $\cos(\theta)$ ). This last  
570 step adjusts the parameters in  $\phi(s, s'; \gamma(\Delta t))$  to account for the effect of habitat selection when

571 estimating the movement kernel (Avgar et al., 2016), and is hence unnecessary if no inference  
572 about movement is being made. The details of how to carry on these adjustments are provided in  
573 Supplementary Appendix C and in Avgar et al. (2016). Importantly, interactions may be included  
574 between movement characteristics (e.g.,  $\log(d_t)$ ,  $\cos(\theta)$ ) and environmental covariates,  $X(s', t)$ , to  
575 allow the movement kernel to depend on the environment. When interactions are included, step 4  
576 results in a movement kernel,  $\phi(s, s'; \gamma(\Delta t, X(s', t)))$ , that depends on the habitat the animal is in  
577 at the start of the movement step (Fig. 4).

### 578 **Interpretation of Parameters in an Integrated Step-Selection Analysis**

579 The habitat-selection parameters in an SSF can be interpreted in the same way as habitat-selection  
580 parameters in HSFs (i.e., as relative intensities, assuming locations are equally available and differing  
581 in terms of a single habitat covariate). Hence, the  $\ln(RSS)$  expressions in Avgar et al. (2017), and  
582 the `log_rss` function in `amt`, are suitable for calculating and interpreting the effects of the various  
583 habitat covariates. However, it is important to recognize that the used and available distributions  
584 in step-selection analyses are dynamic and non-uniform in space. In particular, they depend on  
585 individual's current location and movement tendencies (as well as the observed time scale determined  
586 by  $\Delta t$ ; Barnett & Moorcroft, 2008; Signer, Fieberg, & Avgar, 2017). Thus, questions that require  
587 integrating intensities over space (e.g., eqn. (10)) are more difficult to address. Possible solutions  
588 include using simulation modeling (Signer et al., 2017), solving the master equation (formed by  
589 multiplying the right hand side of eqn. (13) by  $u(s', t)$  and then integrating over  $G$  with respect  
590 to  $s'$ ) for its steady state (Potts et al., 2014a, 2014b), or in some cases, translating the fitted  
591 model into a partial differential equation model with analytical steady-state distribution (Potts &  
592 Schlägel, 2020). We also note that alternative modeling frameworks exist with parameters that  
593 directly describe relative intensities of use at both fine and coarse scales (e.g., Michelot et al., 2019b,  
594 2019a; Michelot, Blackwell, Chamaillé-Jammes, & Matthiopoulos, 2020). These new analytical  
595 developments hold exciting promises to bridge the micro scale of animal movement behavior with the  
596 macro scale of animal spatial distribution but are more computationally challenging to implement.  
597 Most importantly, biologists need to be aware that parameters that describe habitat selection at  
598 local and macro scales may differ, and thus, extra steps may be required to translate movement  
599 dynamics captured by integrated step-selection analyses to the coarser scales typically modeled



600 with traditional habitat-selection functions. The `amt` package has a basic capacity to simulate the  
601 utilization distribution based on a parameterized integrated step-selection function (Signer et al.,  
602 2017), and we expect this approach to become more flexible in the near future, allowing users to  
603 forecast not only steady-state utilization distributions but also transient movement patterns such as  
604 migration and dispersal.

605 Using an integrated step-selection approach (e.g., as in Fig. 4), it is also possible to draw ecological  
606 inference using the selection-free movement kernel. For example, the fitted step-length and turn-angle  
607 distributions can tell us how much more likely an animal is to take large versus small steps or to turn  
608 left or right relative to moving straight. We can also calculate moments of these distributions under  
609 different environmental conditions, which can be informative when our models include interactions  
610 between movement characteristics and environmental predictors. For example, we could calculate  
611 the expected selection-free displacement rates (and/or directionality) as function of local snow depth  
612 (that is, if snow depth was included in our model as an interaction with step length). Once the  
613 selection-free movement parameters are obtained, one can use them to calculate various aspects of  
614 the (theoretical) distributions of step lengths and turn angles, such as the mean, the median, or the  
615 95% confidence bounds (see Supplementary Appendix B for examples).

## 616 Discussion

617 We have highlighted how connecting habitat-selection functions to IPP models and weighted  
618 distribution theory helps with interpreting parameters in habitat-selection functions using simple  
619 examples. We have also reviewed step-selection functions and demonstrated how to estimate  
620 movement and habitat-selection parameters when conducting an integrated step-selection analysis  
621 using the `amt` package. So far, we have focused on interpreting results when analyzing data from a  
622 single individual. We end with a brief discussion addressing statistical dependencies, particularly  
623 when analyzing data from multiple individuals, along with issues related to model transferability  
624 and parameter sensitivity to changes in habitat availability and species population density.

## 625 **Statistical Dependencies**

626 Earlier, we highlighted the importance of statistical independence as it applies to individual locations  
627 when estimating habitat-selection functions. We also noted that step-selection analyses typically  
628 assume step lengths and turn angles are independent of each other and also over time, though it is  
629 possible to account for these correlations using appropriate interactions (e.g., between step length  
630 at time  $t$  and time  $t - 1$ , step length and turn angle both at time  $t$ ). It would be nice to have  
631 multivariate distributions available that are capable of describing correlated step lengths and turn  
632 angles and any inherent autocorrelation. It is plausible, however, that models that allow movement  
633 parameters to vary by habitat type, using interactions between step length, turn angle, and habitat  
634 covariates, will be able to account for much of the autocorrelation and cross-correlation (between  
635 step lengths and turn angles) present in the data. Similarly, autocorrelation and cross-correlations  
636 may be accommodated by models that include a (possibly latent) behavioral state, with movement  
637 and habitat-selection parameters that are state-dependent (Nicosia, Duchesne, Rivest, Fortin, &  
638 others, 2017; Suraci et al., 2019).

639 In addition to cross-correlation between step lengths and turn angles and serial dependencies,  
640 individuals living in different environments may exhibit different habitat-selection patterns, and thus,  
641 repeated observations on the same set of individuals will induce further statistical dependencies.  
642 A simple strategy for dealing with repeated measures when individuals can be assumed to be  
643 independent is to fit models to individual animals and then treat the resulting coefficients as data  
644 when inferring population-level patterns (Murtaugh, 2007; Fieberg et al., 2010). For example,  
645 sample means of the regression coefficients can be used to characterize average habitat-selection  
646 parameters. Estimating among-animal variability is trickier due to sampling error; naively ignoring  
647 sampling error will lead to a positive bias in estimates of among-animal variability, but more formal  
648 two-step methods can address this issue (Craiu, Duchesne, Fortin, & Baillargeon, 2011, 2016; Dickie  
649 et al., 2020). Alternatively, generalized linear mixed models with random coefficients can be used to  
650 quantify among-animal variability in habitat-selection analyses (Muff, Signer, & Fieberg, 2020).

651 Although it is possible to conduct integrated step-selection analyses with hierarchical models  
652 containing random effects, we have much to learn about how these approaches perform in practice.  
653 For example, Muff et al. (2020) found that parameters describing among-animal variability in

654 habitat-selection parameters were biased low when movement characteristics were included in  
655 the model. Mixed-effect models with random coefficients are also “parameter hungry”, requiring  
656  $p(p + 1)/2$  variance and covariance parameters to be estimated, where  $p$  is the number of random  
657 coefficients. Models that allow all coefficients to be animal-specific and to covary are thus likely  
658 to be computationally challenging to fit and problematic for small data sets containing only a few  
659 individuals. For this reason, Muff et al. (2020) assumed coefficients did not covary in their applied  
660 examples. In the context of our fisher analysis, this equates to assuming that knowing an individual’s  
661 coefficient for `popden` tells us nothing about that animal’s parameters for `elevation` or `landuseC`  
662 variables. For categorical variables, it is natural to expect parameters to have a negative covariance  
663 (since, for example, spending more time in `forest` must come at the expense of spending less time  
664 in other landuse categories). Research evaluating the performance of mixed-effect step-selection  
665 analyses under various data-generating scenarios would be helpful for evaluating robustness to  
666 assumption violations (e.g., those regarding the distribution of random parameters).

## 667 **Sensitivity of Selection Coefficients to Species Population Density and Habitat** 668 **Availability**

669 Before concluding, we feel it is important to briefly discuss the oft observed pattern of density  
670 and availability dependence in habitat-selection inference (Myerud & Ims, 1998; Matthiopoulos,  
671 Hebblewhite, Aarts, & Fieberg, 2011; Matthiopoulos et al., 2015, 2020a). Density-dependent  
672 inference may be observed when the same analysis is applied to individuals or populations of  
673 the same species, under similar environmental conditions, but at different population densities.  
674 Availability dependence (also referred to as a “functional response”) may be observed when the  
675 same analysis is applied to individuals or populations of the same species, which experience different  
676 landscape-scale resource or habitat availabilities. For example, van Beest, McLoughlin, Myerud,  
677 & Brook (2016) found that individual elk display availability-dependent habitat-selection patterns  
678 (switching from selection to avoidance of certain habitats as function of the availability of these  
679 habitats within their home range), but that the strength of this functional response depended on elk  
680 population density. Such context dependencies are in fact so common that we do not know of a single  
681 instance where researchers were looking for them and failed to find them. Recently, Avgar, Betini,  
682 & Fryxell (2020) showed that such context dependencies in habitat-selection patterns are expected

683 to emerge even under the simplest theoretical model of an Ideal Free Distribution (Fretwell, 1969).  
684 Thus, habitat-selection models often have poor predictive capacity when transferred across different  
685 study areas, or even within the same area over time (e.g., Torres et al., 2015). Yet, these differences  
686 may also be exploited; modeling frameworks that leverage data from multiple environments and  
687 across a range of population densities can potentially increase predictive capabilities (Matthiopoulos  
688 et al., 2019). As with any other attempt to model complex ecological data, critical evaluation of  
689 model performance for both within and out-of-sample data is essential (Fieberg, Forester, et al.,  
690 2018).

### 691 **Authors' Contributions**

692 JF developed the idea for the review, led the writing of the manuscript, and drafted the initial  
693 version of Supplementary Appendix A; B.S. and J.S. drafted the initial version of Supplementary  
694 Appendix B; B.S. and T.A. drafted the initial version of Supplementary Appendix C. All authors  
695 contributed critically to the manuscript text and Supplementary Files, and gave final approval for  
696 publication.

### 697 **Acknowledgements**

698 We thank J.R. Potts for helpful comments that improved the manuscript. JF received partial salary  
699 support from the Minnesota Agricultural Experimental Station. TA received partial salary support  
700 from the Utah Agricultural Experimental Station.

### 701 **Data Availability**

702 All of the data used in this paper are available from within the `amt` package (Signer et al., 2019).

### 703 **References**

704 Aarts, G., Fieberg, J., & Matthiopoulos, J. (2012). Comparative interpretation of count, presence–  
705 absence and point methods for species distribution models. *Methods in Ecology and Evolution*, 3(1),  
706 177–187.

- 707 Aarts, G., MacKenzie, M., McConnell, B., Fedak, M., & Matthiopoulos, J. (2008). Estimating  
708 space-use and habitat preference from wildlife telemetry data. *Ecography*, *31*(1), 140–160.
- 709 Arthur, S. M., Manly, B. F., McDonald, L. L., & Garner, G. W. (1996). Assessing habitat selection  
710 when availability changes. *Ecology*, *77*(1), 215–227.
- 711 Avgar, T., Betini, G. S., & Fryxell, J. M. (2020). Habitat selection patterns are density-dependent  
712 under the Ideal Free Distribution. *Journal of Animal Ecology*.
- 713 Avgar, T., Lele, S. R., Keim, J. L., & Boyce, M. S. (2017). Relative selection strength: Quantifying  
714 effect size in habitat-and step-selection inference. *Ecology and Evolution*, *7*(14), 5322–5330.
- 715 Avgar, T., Mosser, A., Brown, G. S., & Fryxell, J. M. (2013). Environmental and individual drivers  
716 of animal movement patterns across a wide geographical gradient. *Journal of Animal Ecology*, *82*(1),  
717 96–106.
- 718 Avgar, T., Potts, J. R., Lewis, M. A., & Boyce, M. S. (2016). Integrated step selection analysis:  
719 Bridging the gap between resource selection and animal movement. *Methods in Ecology and*  
720 *Evolution*, *7*(5), 619–630.
- 721 Barnett, A. H., & Moorcroft, P. R. (2008). Analytic steady-state space use patterns and rapid  
722 computations in mechanistic home range analysis. *Journal of Mathematical Biology*, *57*(1), 139–159.
- 723 Boyce, M. S., & McDonald, L. L. (1999). Relating populations to habitats using resource selection  
724 functions. *Trends in Ecology & Evolution*, *14*(7), 268–272.
- 725 Boyce, M. S., Vernier, P. R., Nielsen, S. E., & Schmiegelow, F. K. A. (2002). Evaluating resource  
726 selection functions. *Ecological Modelling*, *157*(2), 281–300. doi:10.1016/S0304-3800(02)00200-4
- 727 Center for International Earth Science Information Network (CIESIN) Columbia University, &  
728 CIAT, Centro Internacional de Agricultura Tropical. (2005, 20190227). Gridded population of the  
729 world, version 3 (gpwv3): Population density grid. Palisades, NY: NASA Socioeconomic Data;  
730 Applications Center (SEDAC). Retrieved from <https://doi.org/10.7927/H4XK8CG2>
- 731 Chamaille-Jammes, S. (2019). A reformulation of the selection ratio shed light on resource selection  
732 functions and leads to a unified framework for habitat selection studies. *bioRxiv*. doi:10.1101/565838

- 733 Craiu, R., Duchesne, T., Fortin, D., & Baillargeon, S. (2016). TwoStepCLogit: Conditional logistic  
734 regression: A two-step estimation method. R package version 1.2. 5.
- 735 Craiu, R. V., Duchesne, T., Fortin, D., & Baillargeon, S. (2011). Conditional logistic regression  
736 with longitudinal follow-up and individual-level random coefficients: A stable and efficient two-step  
737 estimation method. *Journal of Computational and Graphical Statistics*, *20*(3), 767–784.
- 738 Cressie, N. (1992). Statistics for spatial data. *Terra Nova*, *4*(5), 613–617.
- 739 Defourny, P., Schouten, L., Bartalev, S., Bontemps, S., Cacetta, P., De Wit, A., ... others. (2009).  
740 Accuracy assessment of a 300 m global land cover map: The GlobCover Experience.
- 741 Dickie, M., McNay, S. R., Sutherland, G. D., Cody, M., & Avgar, T. (2020). Corridors or risk?  
742 Movement along, and use of, linear features varies predictably among large mammal predator and  
743 prey species. *Journal of Animal Ecology*, *89*(2), 623–634.
- 744 Dodge, S., Bohrer, G., Weinzierl, R., Davidson, S. C., Kays, R., Douglas, D., ... Wikelski, M.  
745 (2013). The environmental-data automated track annotation (env-data) system: Linking animal  
746 tracks with environmental data. *Movement Ecology*, *1*(1), 3.
- 747 Duchesne, T., Fortin, D., & Rivest, L.-P. (2015). Equivalence between step selection functions and  
748 biased correlated random walks for statistical inference on animal movement. *PLoS One*, *10*(4).
- 749 Durante, F., & Sempi, C. (2010). Copula theory: An introduction. In *Copula theory and its*  
750 *applications* (pp. 3–31). Springer.
- 751 Elith, J., & Leathwick, J. R. (2009). Species distribution models: Ecological explanation and  
752 prediction across space and time. *Annual Review of Ecology, Evolution, and Systematics*, *40*(1),  
753 677.
- 754 Elith, J., Phillips, S. J., Hastie, T., Dudik, M., Chee, Y. E., & Yates, C. J. (2011). A statistical  
755 explanation of MaxEnt for ecologists. *Diversity and Distributions*, *17*(1), 43–57.
- 756 Fieberg, J. (2007). Kernel density estimators of home range: Smoothing and the autocorrelation  
757 red herring. *Ecology*, *88*(4), 1059–1066.
- 758 Fieberg, J., Bohrer, G., Davidson, S., & Kays, R. (2018). Short course on analyzing animal tracking

- 759 data. Presented at the North Carolina Museum of Natural Sciences, Raleigh, NC, USA. May 21–23,  
760 2018. <https://movebankworkshopraleighnc.netlify.com/index.html>.
- 761 Fieberg, J., Forester, J. D., Street, G. M., Johnson, D. H., ArchMiller, A. A., & Matthiopoulos, J.  
762 (2018). Used-habitat calibration plots: A new procedure for validating species distribution, resource  
763 selection, and step-selection models. *Ecography*, *41*(5), 737–752.
- 764 Fieberg, J., Matthiopoulos, J., Hebblewhite, M., Boyce, M. S., & Frair, J. L. (2010). Correlation  
765 and studies of habitat selection: Problem, red herring or opportunity? *Philosophical Transactions*  
766 *of the Royal Society of London B: Biological Sciences*, *365*(1550), 2233–2244.
- 767 Fieberg, J., Rieger, R. H., Zicus, M. C., & Schildcrout, J. S. (2009). Regression modelling of  
768 correlated data in ecology: Subject-specific and population averaged response patterns. *Journal of*  
769 *Applied Ecology*, *46*(5), 1018–1025.
- 770 Fieberg, J. R., Vitense, K., & Johnson, D. H. (2020). Resampling-based methods for biologists.  
771 *PeerJ*, *8*, e9089.
- 772 Fithian, W., & Hastie, T. (2013). Finite-sample equivalence in statistical models for presence-only  
773 data. *The Annals of Applied Statistics*, *7*(4), 1917.
- 774 Fleming, C. H., Calabrese, J. M., Mueller, T., Olson, K. A., Leimgruber, P., & Fagan, W. F. (2014).  
775 From fine-scale foraging to home ranges: A semivariance approach to identifying movement modes  
776 across spatiotemporal scales. *The American Naturalist*, *183*(5), E154–E167.
- 777 Forester, J. D., Im, H. K., & Rathouz, P. J. (2009). Accounting for animal movement in estimation  
778 of resource selection functions: Sampling and data analysis. *Ecology*, *90*(12), 3554–3565.
- 779 Fortin, D., Beyer, H. L., Boyce, M. S., Smith, D. W., Duchesne, T., & Mao, J. S. (2005). Wolves  
780 influence elk movements: Behavior shapes a trophic cascade in Yellowstone National Park. *Ecology*,  
781 *86*(5), 1320–1330.
- 782 Fretwell, S. D. (1969). On territorial behavior and other factors influencing habitat distribution in  
783 birds. *Acta Biotheoretica*, *19*(1), 45–52.
- 784 Guisan, A., Thuiller, W., & Zimmermann, N. E. (2017). *Habitat suitability and distribution models:*

- 785 *With applications in R*. Cambridge University Press.
- 786 Hirzel, A. H., & Le Lay, G. (2008). Habitat suitability modelling and niche theory. *Journal of*  
787 *Applied Ecology*, 45(5), 1372–1381.
- 788 Hooten, M. B., Hanks, E. M., Johnson, D. S., & Alldredge, M. W. (2013). Reconciling resource  
789 utilization and resource selection functions. *Journal of Animal Ecology*, 82(6), 1146–1154.
- 790 Hooten, M. B., Johnson, D. S., McClintock, B. T., & Morales, J. M. (2017). *Animal movement:*  
791 *Statistical models for telemetry data*. CRC press.
- 792 Hosmer, D. W., Lemeshow, S., & Sturdivant, R. X. (2013). *Applied logistic regression* (Vol. 398).  
793 John Wiley & Sons.
- 794 Johnson, C. J., Nielsen, S. E., Merrill, E. H., McDonald, T. L., & Boyce, M. S. (2006). Resource  
795 selection functions based on use-availability data: Theoretical motivation and evaluation methods.  
796 *Journal of Wildlife Management*, 70(2), 347–357.
- 797 Johnson, D. H. (1980). The comparison of usage and availability measurements for evaluating  
798 resource preference. *Ecology*, 61(1), 65–71.
- 799 Johnson, D. S., Hooten, M. B., & Kuhn, C. E. (2013). Estimating animal resource selection from  
800 telemetry data using point process models. *Journal of Animal Ecology*, 82(6), 1155–1164.
- 801 Johnson, D. S., Thomas, D. L., Ver Hoef, J. M., & Christ, A. (2008). A general framework  
802 for the analysis of animal resource selection from telemetry data. *Biometrics*, 64(3), 968–76.  
803 doi:10.1111/j.1541-0420.2007.00943.x
- 804 Kays, R., Crofoot, M. C., Jetz, W., & Wikelski, M. (2015). Terrestrial animal tracking as an eye on  
805 life and planet. *Science*, 348(6240), aaa2478.
- 806 Keating, K. A., & Cherry, S. (2004). Use and interpretation of logistic regression in habitat-selection  
807 studies. *Journal of Wildlife Management*, 68(4), 774–789.
- 808 Kéry, M. (2010). *Introduction to WinBUGS for ecologists: Bayesian approach to regression, ANOVA,*  
809 *mixed models and related analyses*. Academic Press.
- 810 Koper, N., & Manseau, M. (2009). Generalized estimating equations and generalized linear



- 811 mixed-effects models for modelling resource selection. *Journal of Applied Ecology*, 46(3), 590–599.  
812 doi:10.1111/j.1365-2664.2009.01642.x
- 813 LaPoint, S., Gallery, P., Wikelski, M., & Kays, R. (2013a). Animal behavior, cost-based corridor  
814 models, and real corridors. *Landscape Ecology*, 28(8), 1615–1630.
- 815 LaPoint, S., Gallery, P., Wikelski, M., & Kays, R. (2013b). Data from: Animal behavior, cost-based  
816 corridor models, and real corridors. *Movebank Data Repository*. doi:10.5441/001/1.2tp2j43g
- 817 Lele, S. R., & Keim, J. L. (2006). Weighted distributions and estimation of resource selection  
818 probability functions. *Ecology*, 87(12), 3021–3028.
- 819 Lele, S. R., Merrill, E. H., Keim, J., & Boyce, M. S. (2013). Selection, use, choice and occupancy:  
820 Clarifying concepts in resource selection studies. *Journal of Animal Ecology*, 82(6), 1183–1191.
- 821 Manly, B., McDonald, L., Thomas, D., McDonald, T. L., & Erickson, W. P. (2002). *Resource*  
822 *selection by animals: Statistical design and analysis for field studies*. Springer Science & Business  
823 Media.
- 824 Matthiopoulos, J. (2003). The use of space by animals as a function of accessibility and preference.  
825 *Ecological Modelling*, 159(2-3), 239–268. doi:10.1016/S0304-3800(02)00293-4
- 826 Matthiopoulos, J., Fieberg, J., & Aarts, G. (2020a). *Species-habitat associations: Spatial data,*  
827 *predictive models, and ecological insights*. University of Minnesota Libraries Publishing. Retrieved  
828 from the University of Minnesota Digital Conservancy, <http://hdl.handle.net/11299/217469>.
- 829 Matthiopoulos, J., Fieberg, J., Aarts, G., Barraquand, F., & Kendall, B. E. (2020b). Within reach?  
830 Habitat availability as a function of individual mobility and spatial structuring. *The American*  
831 *Naturalist*, 195(6), 1009–1026.
- 832 Matthiopoulos, J., Fieberg, J., Aarts, G., Beyer, H. L., Morales, J. M., & Haydon, D. T. (2015).  
833 Establishing the link between habitat selection and animal population dynamics. *Ecological Mono-*  
834 *graphs*, 85(3), 413–436. doi:10.1890/14-2244.1
- 835 Matthiopoulos, J., Field, C., & MacLeod, R. (2019). Predicting population change from models based  
836 on habitat availability and utilization. *Proceedings of the Royal Society B*, 286(1901), 20182911.

- 837 Matthiopoulos, J., Hebblewhite, M., Aarts, G., & Fieberg, J. (2011). Generalized functional  
838 responses for species distributions. *Ecology*, *92*(3), 583–589.
- 839 McClintock, B. T. (2017). Incorporating telemetry error into hidden markov models of animal  
840 movement using multiple imputation. *Journal of Agricultural, Biological and Environmental*  
841 *Statistics*, *22*(3), 249–269.
- 842 Merow, C., Smith, M. J., & Silander, J. A. (2013). A practical guide to maxent for modeling species'  
843 distributions: What it does, and why inputs and settings matter. *Ecography*, *36*(10), 1058–1069.
- 844 Michelot, T., Blackwell, P. G., Chamaillé-Jammes, S., & Matthiopoulos, J. (2020). Inference in  
845 MCMC step selection models. *Biometrics*, *76*(2), 438–447.
- 846 Michelot, T., Blackwell, P. G., & Matthiopoulos, J. (2019a). Linking resource selection and step  
847 selection models for habitat preferences in animals. *Ecology*, *100*(1).
- 848 Michelot, T., Gloaguen, P., Blackwell, P. G., & Étienne, M.-P. (2019b). The langevin diffusion  
849 as a continuous-time model of animal movement and habitat selection. *Methods in Ecology and*  
850 *Evolution*, *10*(11), 1894–1907.
- 851 Millsaugh, J. J., Nielson, R. M., McDonald, L., Marzluff, J. M., Gitzen, R. A., Rittenhouse, C. D.,  
852 ... Sheriff, S. L. (2006). Analysis of resource selection using utilization distributions. *The Journal*  
853 *of Wildlife Management*, *70*(2), 384–395.
- 854 Muff, S., Signer, J., & Fieberg, J. (2020). Accounting for individual-specific variation in habitat-  
855 selection studies: Efficient estimation of mixed-effects models using bayesian or frequentist compu-  
856 tation. *Journal of Animal Ecology*, *89*(1), 80–92.
- 857 Munden, R., Borger, L., Wilson, R. P., Redcliffe, J., Brown, R., Garel, M., & Potts, J. R. (2020).  
858 Why did the animal turn? Time-varying step selection analysis for inference between observed  
859 turning points in high frequency data. *bioRxiv*. doi:10.1101/2020.08.13.249151
- 860 Murtaugh, P. A. (2007). Simplicity and complexity in ecological data analysis. *Ecology*, *88*(1),  
861 56–62.
- 862 Mysterud, A., & Ims, R. A. (1998). Functional responses in habitat use: Availability influences

- 863 relative use in trade-off situations. *Ecology*, 79(4), 1435–1441.
- 864 Nicosia, A., Duchesne, T., Rivest, L.-P., Fortin, D., & others. (2017). A multi-state conditional  
865 logistic regression model for the analysis of animal movement. *The Annals of Applied Statistics*,  
866 11(3), 1537–1560.
- 867 Otis, D. L., & White, G. C. (1999). Autocorrelation of location estimates and the analysis of  
868 radiotracking data. *The Journal of Wildlife Management*, 1039–1044.
- 869 Otto, S. P., & Rosales, A. (2020). Theory in service of narratives in evolution and ecology. *The*  
870 *American Naturalist*, 195(2), 290–299.
- 871 Phillips, S. J., & Dudík, M. (2008). Modeling of species distributions with Maxent: New extensions  
872 and a comprehensive evaluation. *Ecography*, 31(2), 161–175.
- 873 Potts, J. R., Bastille-Rousseau, G., Murray, D. L., Schaefer, J. A., & Lewis, M. A. (2014a). Predicting  
874 local and non-local effects of resources on animal space use using a mechanistic step selection model.  
875 *Methods in Ecology and Evolution*, 5(3), 253–262. doi:10.1111/2041-210X.12150
- 876 Potts, J. R., Mokross, K., Stouffer, P. C., & Lewis, M. A. (2014b). Step selection techniques  
877 uncover the environmental predictors of space use patterns in flocks of amazonian birds. *Ecology*  
878 *and Evolution*, 4(24), 4578–4588.
- 879 Potts, J. R., & Schlägel, U. E. (2020). Parametrising diffusion-taxis equations from animal movement  
880 trajectories using step selection analysis. *Methods in Ecology and Evolution*.
- 881 Prima, M.-C., Duchesne, T., & Fortin, D. (2017). Robust inference from conditional logistic  
882 regression applied to movement and habitat selection analysis. *PloS One*, 12(1).
- 883 Prokopenko, C. M., Boyce, M. S., & Avgar, T. (2017). Characterizing wildlife behavioural responses  
884 to roads using integrated step selection analysis. *Journal of Applied Ecology*, 54(2), 470–479.
- 885 R Core Team. (2019). *R: A language and environment for statistical computing*. Vienna, Austria:  
886 R Foundation for Statistical Computing. Retrieved from <https://www.R-project.org/>
- 887 Renner, I. W., Elith, J., Baddeley, A., Fithian, W., Hastie, T., Phillips, S. J., ... Warton, D. I.  
888 (2015). Point process models for presence-only analysis. *Methods in Ecology and Evolution*, 6(4),

889 366–379.

890 Rhodes, J. R., McAlpine, C. A., Lunney, D., & Possingham, H. P. (2015). A spatially explicit habitat  
891 selection model incorporating home range behavior. *Ecology*, *86*(5), 1199–1205. doi:10.1890/04-0912

892 Robinson, O. J., Ruiz-Gutierrez, V., Reynolds, M. D., Golet, G. H., Strimas-Mackey, M., & Fink, D.  
893 (2020). Integrating citizen science data with expert surveys increases accuracy and spatial extent of  
894 species distribution models. *Diversity and Distributions*.

895 Scrafford, M. A., Avgar, T., Heeres, R., & Boyce, M. S. (2018). Roads elicit negative movement and  
896 habitat-selection responses by wolverines (*gulo gulo luscus*). *Behavioral Ecology*, *29*(3), 534–542.

897 Signer, J., & Fieberg, J. (2020). A fresh look at an old concept: Home-range estimation in a tidy  
898 world. *bioRxiv*. doi:10.1101/2020.08.19.256859

899 Signer, J., Fieberg, J., & Avgar, T. (2017). Estimating utilization distributions from fitted step-  
900 selection functions. *Ecosphere*, *8*(4). doi:10.1002/ecs2.1771

901 Signer, J., Fieberg, J., & Avgar, T. (2019). Animal movement tools (amt): R package for managing  
902 tracking data and conducting habitat selection analyses. *Ecology and Evolution*, (July 2018),  
903 880–890. doi:10.1002/ece3.4823

904 Suraci, J. P., Frank, L. G., Oriol-Cotterill, A., Ekwanga, S., Williams, T. M., & Wilmers, C. C.  
905 (2019). Behavior-specific habitat selection by african lions may promote their persistence in a  
906 human-dominated landscape. *Ecology*, *100*(4), e02644.

907 Thurfjell, H., Ciuti, S., & Boyce, M. S. (2014). Applications of step-selection functions in ecology  
908 and conservation. *Movement Ecology*, *2*(4).

909 Torres, L. G., Sutton, P. J., Thompson, D. R., Delord, K., Weimerskirch, H., Sagar, P. M., ...  
910 Phillips, R. A. (2015). Poor transferability of species distribution models for a pelagic predator,  
911 the grey petrel, indicates contrasting habitat preferences across ocean basins. *PLoS One*, *10*(3),  
912 e0120014.

913 U. S. / Japan ASTER Science Team. (2009). ASTER global digital elevation model data set. NASA  
914 eosdis land processes daac. [https://lpdaac.usgs.gov/dataset\\_discovery/aster/aster\\_products\\_](https://lpdaac.usgs.gov/dataset_discovery/aster/aster_products_)

915 table/astgtm\_v002. doi:10.5067/ASTER/ASTGTM.002

916 van Beest, F. M., McLoughlin, P. D., Mysterud, A., & Brook, R. K. (2016). Functional responses in  
917 habitat selection are density dependent in a large herbivore. *Ecography*, *39*(6), 515–523.

918 Van Winkle, W. (1975). Comparison of several probabilistic home-range models. *The Journal of*  
919 *Wildlife Management*, 118–123.

920 Warton, D. I., & Shepherd, L. C. (2010). Poisson point process models solve the ‘pseudo-absence  
921 problem’ for presence-only data in ecology. *The Annals of Applied Statistics*, *4*(3), 1383–1402.

922 Worton, B. J. (1989). Kernel methods for estimating the utilization distribution in home-range  
923 studies. *Ecology*, *70*(1), 164–168.

924 Yates, K. L., Bouchet, P. J., Caley, M. J., Mengersen, K., Randin, C. F., Parnell, S., . . . others.  
925 (2018). Outstanding challenges in the transferability of ecological models. *Trends in Ecology and*  
926 *Evolution*, *33*(10), 790–802.

927 **Tables**

Table 1: Regression coefficients (SE) in fitted habitat-selection functions fit to data from Lupe the fisher. Models 1 and 3 use forest as the reference level, Model 2 uses wet as the reference level. Model 3 includes interactions between elevation and landcover classes.

|                         | Model 1            | Model 2            | Model 3            |
|-------------------------|--------------------|--------------------|--------------------|
| (Intercept)             | -13.168<br>(0.019) | -12.918<br>(0.107) | -13.171<br>(0.020) |
| elevation               | 0.303<br>(0.017)   | 0.303<br>(0.017)   | 0.313<br>(0.017)   |
| popden                  | -0.183<br>(0.021)  | -0.183<br>(0.021)  | -0.186<br>(0.021)  |
| landuseCgrass           | -1.477<br>(0.278)  |                    | -1.471<br>(0.278)  |
| landuseCwet             | 0.250<br>(0.108)   |                    | 0.183<br>(0.116)   |
| landuseC1forest         |                    | -0.250<br>(0.108)  |                    |
| landuseC1grass          |                    | -1.727<br>(0.297)  |                    |
| elevation:landuseCgrass |                    |                    | 0.112<br>(0.380)   |
| elevation:landuseCwet   |                    |                    | -0.498<br>(0.127)  |

928 **Figures**

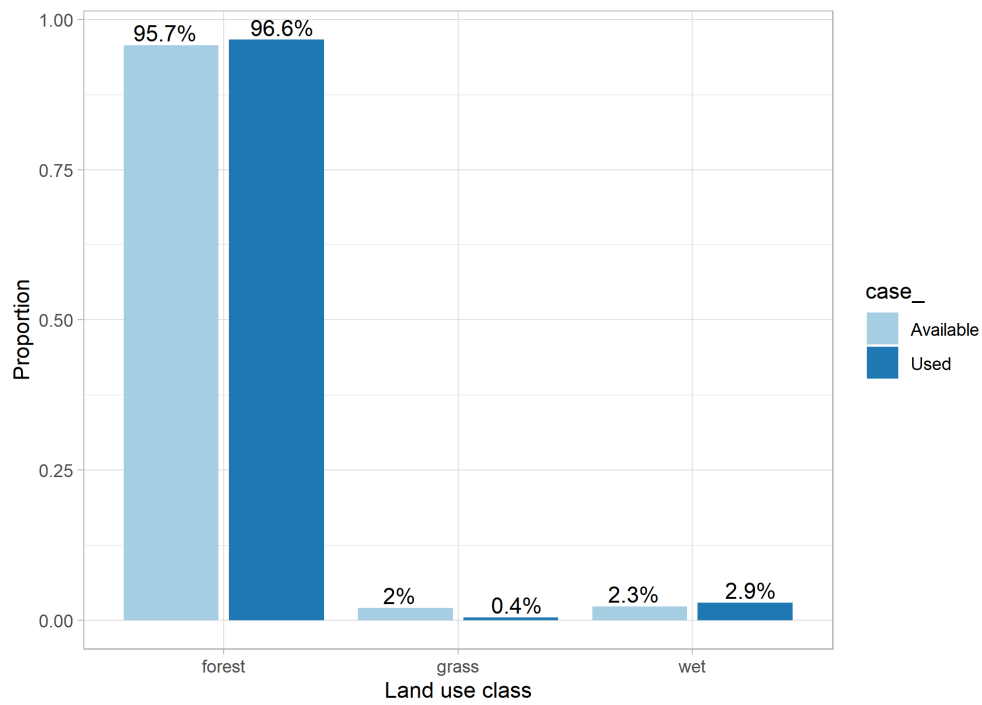

Figure 1: Distribution of used and available locations among different landscape cover classes for a fisher in upstate New York (LaPoint et al., 2013a, 2013b).

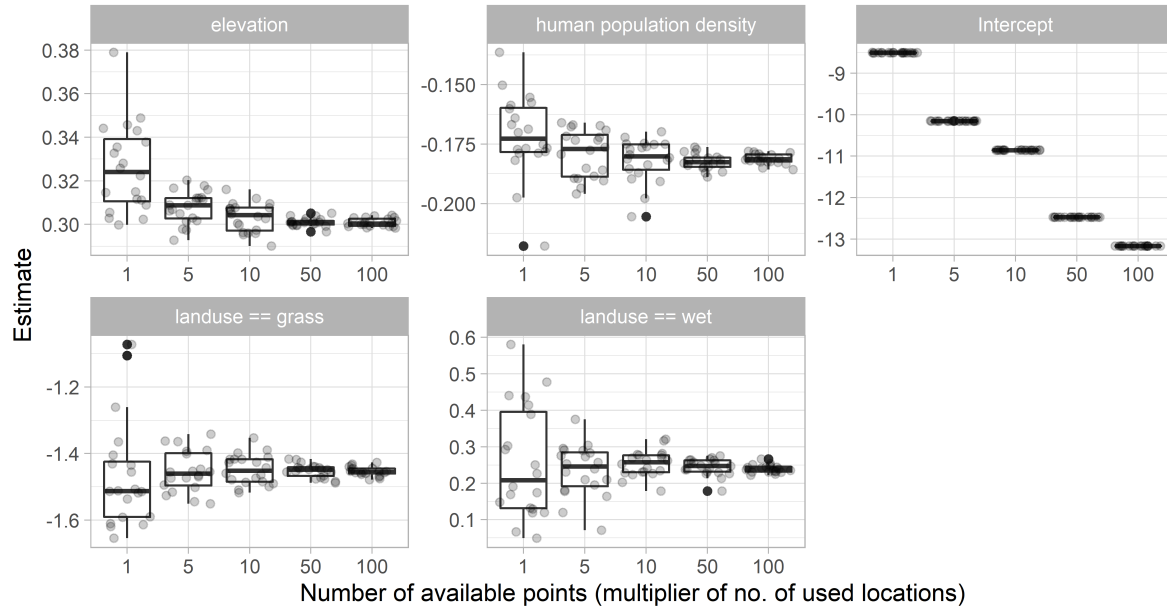

Figure 2: Estimated parameters in fitted habitat-selection functions using increasing numbers of available points. Each dot represents an estimate from fitting a logistic regression model to 3004 GPS telemetry locations combined with a random sample of available points, with sample size given by the x-axis (where 1 means 3004 available points and 100 means 300,400 available points).



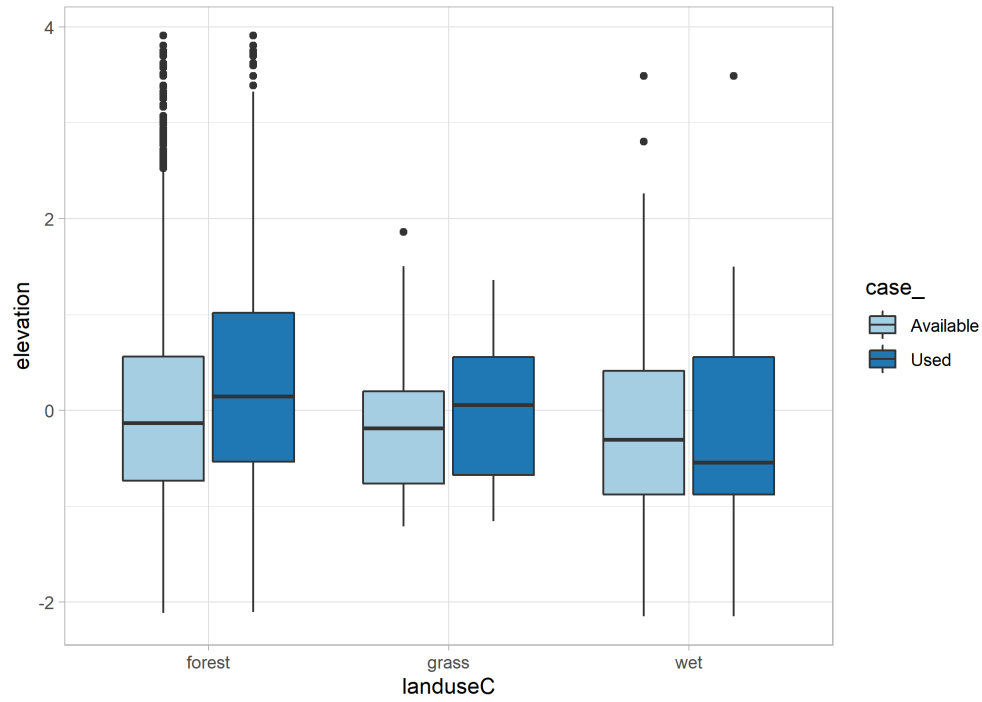

Figure 3: Distribution of elevation at used and available locations within each of 3 landcover types.

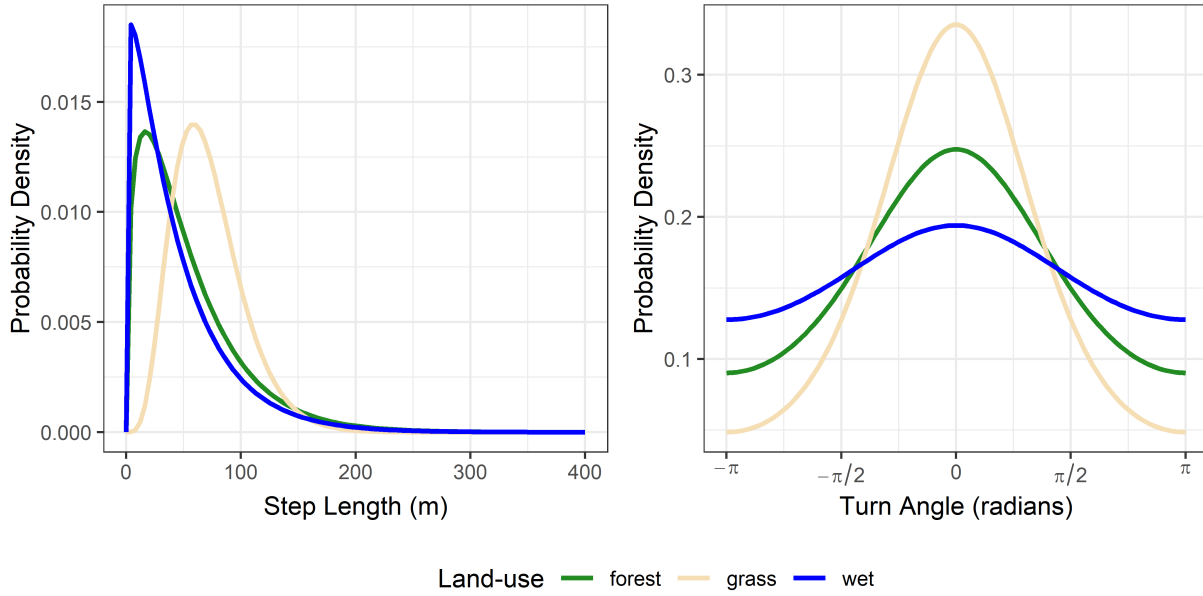

Figure 4: Step-length and turn-angle distributions from an integrated step-selection analysis applied to Lupe’s location data (see Supplementary Appendix B). The conditional logistic regression model included interactions between movement characteristics (step length, log step length, and cosine of the turn angle) and the landuse category Lupe was in at the start of the movement step. We see that Lupe tends to take larger, more directed steps when in **grass** and slower and more tortuous steps in **wet** habitat.

929 **Box 1: Overview of Habitat-Selection Functions (HSFs)**

- 930 • Habitat-selection functions (HSFs; historically referred to as ‘resource-selection functions’;  
931 Boyce & McDonald, 1999) provide a framework for linking locations of individual animals to  
932 important features of their environment (i.e., resources, risks, and environmental conditions).
- 933 • Exponential HSFs, the most common HSF in the literature, take the form  $w(X(s); \beta) =$   
934  $\exp(X_1(s)\beta_1 + \dots + X_k(s)\beta_k)$ ; where the  $X_1(s), \dots, X_k(s)$  are  $k$  environmental predictors asso-  
935 ciated with location  $s$ , and the  $\beta_1, \dots, \beta_k$  are parameters to be estimated.
- 936 • Parameters in HSFs are typically estimated using logistic regression, but with use-availability  
937 data rather than presence-absence data. The use of logistic regression to model use-availability  
938 data has created significant confusion in the literature.
- 939 • Inhomogeneous Poisson Point-process Models (IPPs) and Weighted Distribution Theory  
940 provide suitable frameworks for interpreting HSF parameters estimated using logistic regression.  
941 These frameworks require that users include sufficient available points to ensure parameter  
942 estimates converge to stable values (Figure 2; Warton & Shepherd, 2010). In addition, available  
943 points should be assigned large weights when fitting logistic regression models (Fithian &  
944 Hastie, 2013).
- 945 • For continuous predictors,  $X_j$ , exponentiated HSF coefficients,  $\exp(\beta_j)$ , quantify the relative  
946 intensity of use of locations that differ by 1 unit of  $X_j$ , but are otherwise equivalent (i.e.,  
947 they are assumed to be equally available and to have equivalent values for all other predictor  
948 variables).
- 949 • For categorical predictors,  $X_j$ , exponentiated HSF coefficients,  $\exp(\beta_j)$ , quantify the relative  
950 intensity of use of locations in category  $j$  relative to locations in a reference category, assuming  
951 both categories are equally available and that the locations do not differ with respect to other  
952 predictors.

## 953 **Box 2: Overview of Step-Selection Analyses**

- 954 • Step-selection analyses model transitions or “steps” connecting sequential locations in geo-  
955 graphical space using a selection-free movement kernel,  $\phi$ , multiplied by a habitat-selection  
956 kernel,  $w$ . Available locations are dynamic in space and time, with availability determined by  
957 the previous location and the animal’s selection-free movement kernel.
- 958 • The selection-free movement kernel describes how the animal would move in homogeneous  
959 habitat or in the absence of habitat selection.
- 960 • Movement and habitat-selection parameters are typically estimated in a multi-step process:
  - 961 1. preliminary movement parameters are estimated using observed step lengths and turn  
962 angles;
  - 963 2. time-dependent availability distributions are generated by simulating potential movements  
964 from the previously observed location;
  - 965 3. habitat-selection parameters are estimated using conditional logistic regression, with  
966 strata formed by combining time-dependent used and available locations;
  - 967 4. if movement characteristics (e.g. log step-length, cosine of the turn angle) are included in  
968 the model, parameters associated with these characteristics can be used to update the  
969 preliminary movement parameters from step 1. Including movement characteristics in  
970 the model can reduce bias in the habitat-selection parameters (Forester et al., 2009) and  
971 improve estimates of movement parameters (Avgar et al., 2016).
- 972 • Interactions between movement characteristics (e.g. log step-length, cosine of the turn angle)  
973 and environmental covariates may be included in the conditional logistic regression model to  
974 allow the movement kernel to depend on the environment.
- 975 • Habitat-selection parameters can be interpreted in terms of relative intensities of use, assuming  
976 locations are equally available and differing in terms of a single habitat covariate. However,  
977 parameters that describe habitat-selection at local and macro scales may differ, and extra  
978 steps may be required to translate movement dynamics captured by integrated step-selection  
979 analyses to the courser scales typically modeled with HSFs (e.g., Potts et al., 2014a, 2014b;  
980 Signer et al., 2017; Potts & Schlägel, 2020).

## 981 **Supporting Information**

982 **Supplementary Appendix A:** `AppA_HSF_examples.html`, a tutorial demonstrating how to fit  
983 and interpret parameters in habitat-selection functions.

984 **Supplementary Appendix B:** `AppB_SSF_examples.html`, a tutorial demonstrating how to fit  
985 and interpret parameters and output when conducting an integrated step-selection analysis.

986 **Supplementary Appendix C:** `AppC_iSSA_movement.html`, a description of methods used to  
987 adjust ‘tentative’ parameters in step-length and turn-angle distributions for the effects of habitat  
988 selection.
